# Supplementary material for: Ring-opening polymerization of ω-6-hexadecenlactone by a salicylaldiminato aluminum complex: a route to semicrystalline and functional poly(ester)s
Source: Royal Society of Chemistry journal article supplement (doi:10.1039/c4py01445f), 2014-12-15
Supplement: c4py01445f1.pdf [file c4py01445f1.pdf]

## *Supporting Information*

### **Ring-Opening Polymerization of $\omega$ -6-Hexadecenlactone by Salicylaldiminato Aluminum Complex: a Route to Semicrystalline and Functional Poly(ester)s**

Tiziana Fuoco,<sup>1</sup> Angelo Meduri,<sup>2</sup> Marina Lamberti,<sup>1</sup> Vincenzo Venditto,<sup>1</sup> Claudio Pellecchia<sup>1</sup> and Daniela Pappalardo<sup>2\*</sup>

<sup>1</sup>*Dipartimento di Chimica e Biologia, Università di Salerno, via Giovanni Paolo II 132, 84084 Fisciano, Salerno (Italy)*

<sup>2</sup>*Dipartimento di Scienze e Tecnologie, Università del Sannio, via dei Mulini 59/A, 82100 Benevento (Italy)*

*Email: pappalardo@unisannio.it*

=====

**Scheme S1.** Polymerization of 6- $\omega$ -hexadecenlactone.

**Figure S1.** <sup>1</sup>H NMR of 6- $\omega$ -hexadecenlactone.

**Figure S2.** <sup>13</sup>C NMR of 6- $\omega$ -hexadecenlactone.

**Table S1.** Polymerization of  $\omega$ -6-hexadecenlactone.

**Figure S3.** Conversion versus time plot.

**Figure S4.** <sup>13</sup>C NMR spectra of poly(6- $\omega$ -hexadecenlactone) and poly(6,7-epoxy- $\omega$ -hexadecalactone) (*b*).

**Figure S5.** <sup>1</sup>H NMR spectrum of poly(hydroxy- $\omega$ -hexadecalactone) (*c*).

**Figure S6.** FT-IR spectrum of poly(6,7-epoxy- $\omega$ -hexadecalactone) (**b**) and poly(hydroxy- $\omega$ -hexadecalactone) (**c**).

**Figure S7.**  $^{13}\text{C}$  NMR spectrum of poly( $\omega$ -hexadecalactone) with 6-mercapto-1-hexanol groups (**d**).

**Figure S8.** DEPT-135 NMR spectrum of poly( $\omega$ -hexadecalactone) with 6-mercapto-1-hexanol groups (**d**).

**Figure S9.**  $^1\text{H}$  NMR of poly[(6- $\omega$ -hexadecenlactone)-*ran*-( $\epsilon$ -caprolactone)].

**Table S2.** NMR, DSC and GPC characterization data of di-block copolymers.

**Figure S10.**  $^1\text{H}$  NMR of poly(6- $\omega$ -hexadecenlactone)-*block*-poly( $\epsilon$ -caprolactone).

**Figure S11.**  $^{13}\text{C}$  NMR of poly(6- $\omega$ -hexadecenlactone)-*block*-poly( $\epsilon$ -caprolactone).

**Figure S12.** 2D DOSY NMR of poly(6- $\omega$ -hexadecenlactone)-*block*-( $\epsilon$ -caprolactone).

**Figure S13.**  $^1\text{H}$  NMR of poly(6- $\omega$ -hexadecenlactone)-*block*-poly(*rac*-lactide).

**Figure S14.**  $^{13}\text{C}$  NMR of poly(6- $\omega$ -hexadecenlactone)-*block*-poly(*rac*-lactide).

**Figure S15.** 2D DOSY NMR of poly(6- $\omega$ -hexadecenlactone)-*block*-poly(*rac*-lactide).

**Figure S16.**  $^1\text{H}$  NMR of poly[(6- $\omega$ -hexadecenlactone)-*ran*-( $\epsilon$ -caprolactone)]-*block*-poly(*rac*-lactide).

**Figure S17.**  $^{13}\text{C}$  NMR of poly[(6- $\omega$ -hexadecenlactone)-*ran*-( $\epsilon$ -caprolactone)]-*block*-poly(*rac*-lactide).

**Figure S18.** DSC thermogram of poly(6,7-epoxy- $\omega$ -hexadecanlactone) (**b**).

**Figure S19.** DSC thermogram of poly(hydroxy- $\omega$ -hexadecalactone) (**c**).

**Figure S20.** DSC thermogram of poly( $\omega$ -hexadecalactone) with 6-mercapto-1-hexanol groups (**d**).

**Figure S21.** DSC thermogram of poly[(6- $\omega$ -hexadecenlactone)-*ran*-( $\epsilon$ -caprolactone)].

**Figure S22.** DSC thermogram of poly(6- $\omega$ -hexadecenlactone)-*block*-poly( $\epsilon$ -caprolactone).

**Figure S23.** DSC thermogram of poly(6- $\omega$ -hexadecenlactone)-*block*-poly(*rac*-lactide).

**Figure S24.** DSC thermogram of poly[(6- $\omega$ -hexadecenlactone)-*ran*-( $\epsilon$ -caprolactone)]-*block*-poly(*rac*-lactide).

**Figure S25.** X-ray diffraction pattern of: (a) poly(6- $\omega$ -hexadecenlactone); (b) poly(6- $\omega$ -hexadecenlactone)-*block*-poly( $\epsilon$ -caprolactone).

**Figure S26.** GPC chromatogram of poly(6- $\omega$ -hexadecenlactone).

**Figure S27.** GPC chromatogram of poly[(6- $\omega$ -hexadecenlactone)-*ran*-( $\epsilon$ -caprolactone)].

**Figure S28.** GPC chromatogram of poly(6- $\omega$ -hexadecenlactone)-*block*-poly( $\epsilon$ -caprolactone).

**Figure S29.** GPC chromatogram of poly(6- $\omega$ -hexadecenlactone)-*block*-(*rac*-lactide).

**Figure S30.** GPC chromatogram of poly[(6- $\omega$ -hexadecenlactone)-*ran*-( $\epsilon$ -caprolactone)]-*block*-poly(*rac*-lactide).

**Figure S31.** MALDI-ToF-MS of poly(6- $\omega$ -hexadecenlactone).

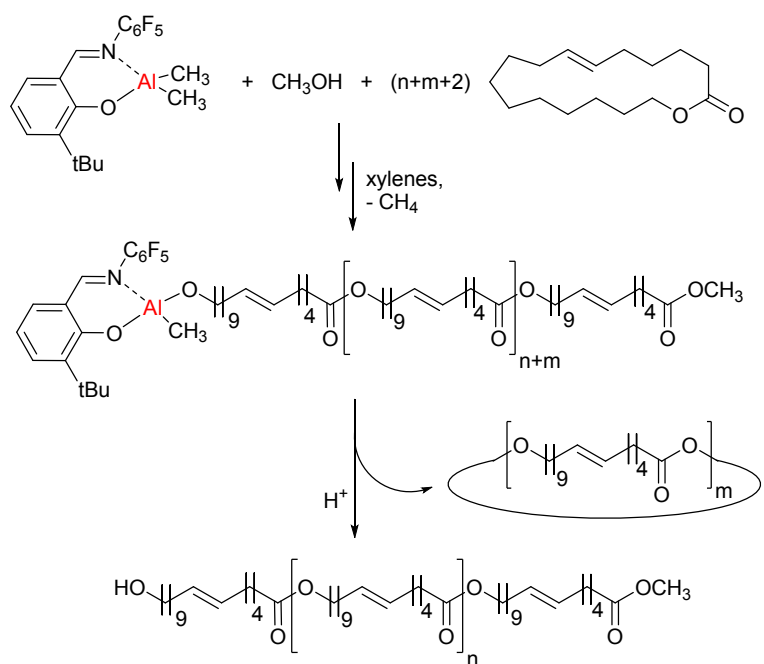

**Scheme S1.** Polymerization of 6- $\omega$ -hexadecenolactone by compound 1.

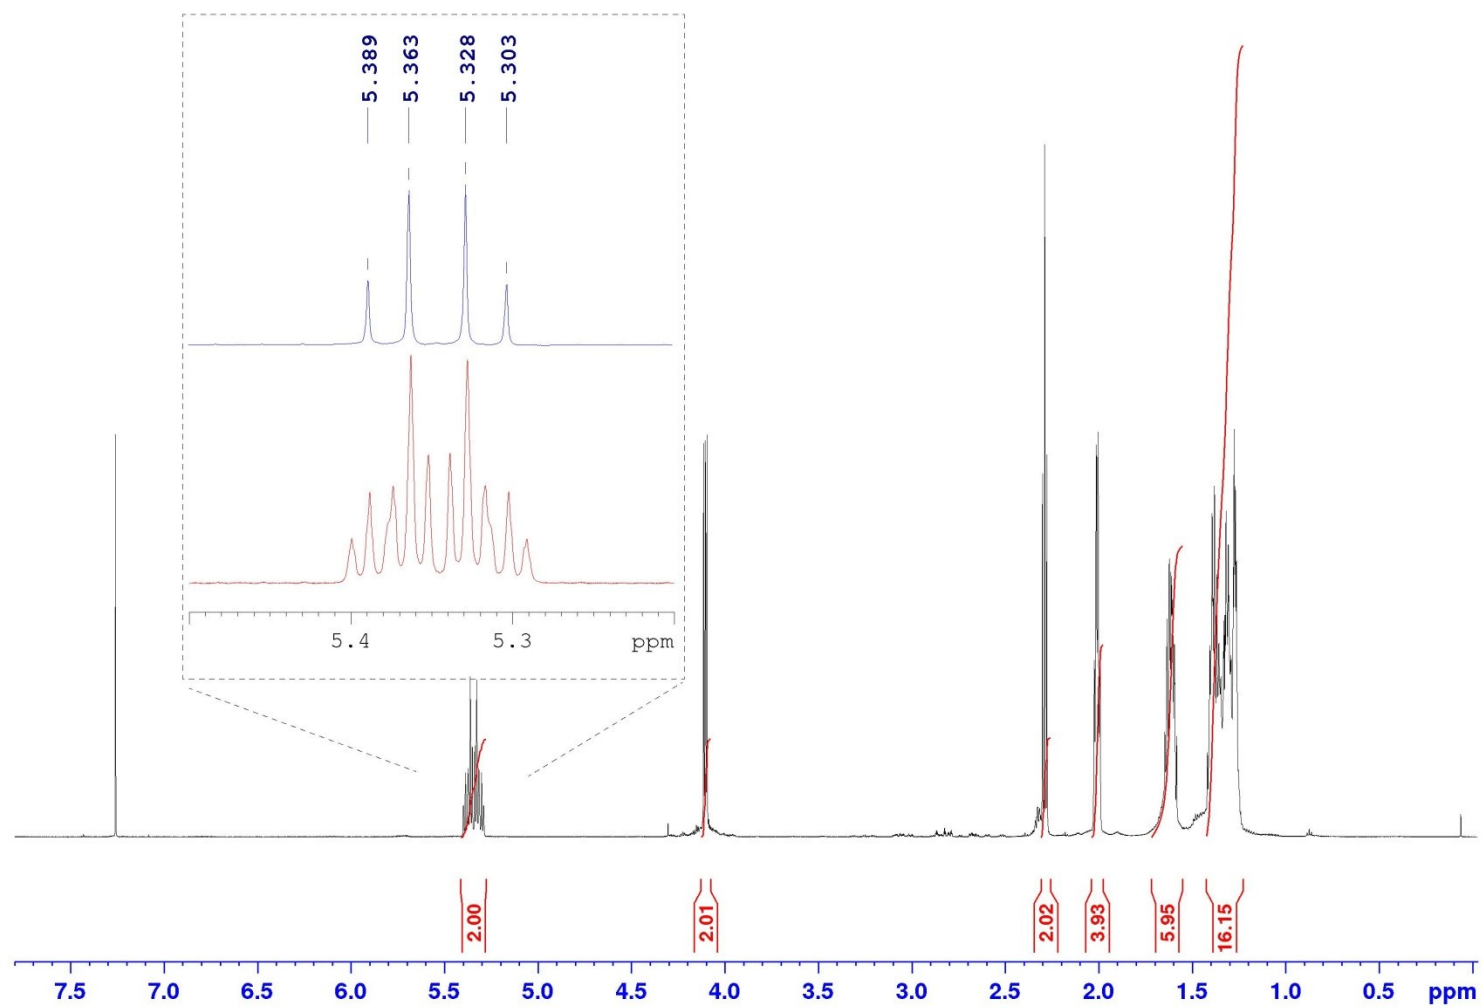

**Figure S1.**  $^1\text{H}$  NMR (600 MHz,  $\text{CDCl}_3$ , RT) of 6- $\omega$ -hexadecenlactone. In the enlargement: comparison between  $^1\text{H}$  NMR (red) and homonuclear-decoupled  $^1\text{H}$  NMR (blue) of olefinic region irradiating allylic protons (2.0 ppm).

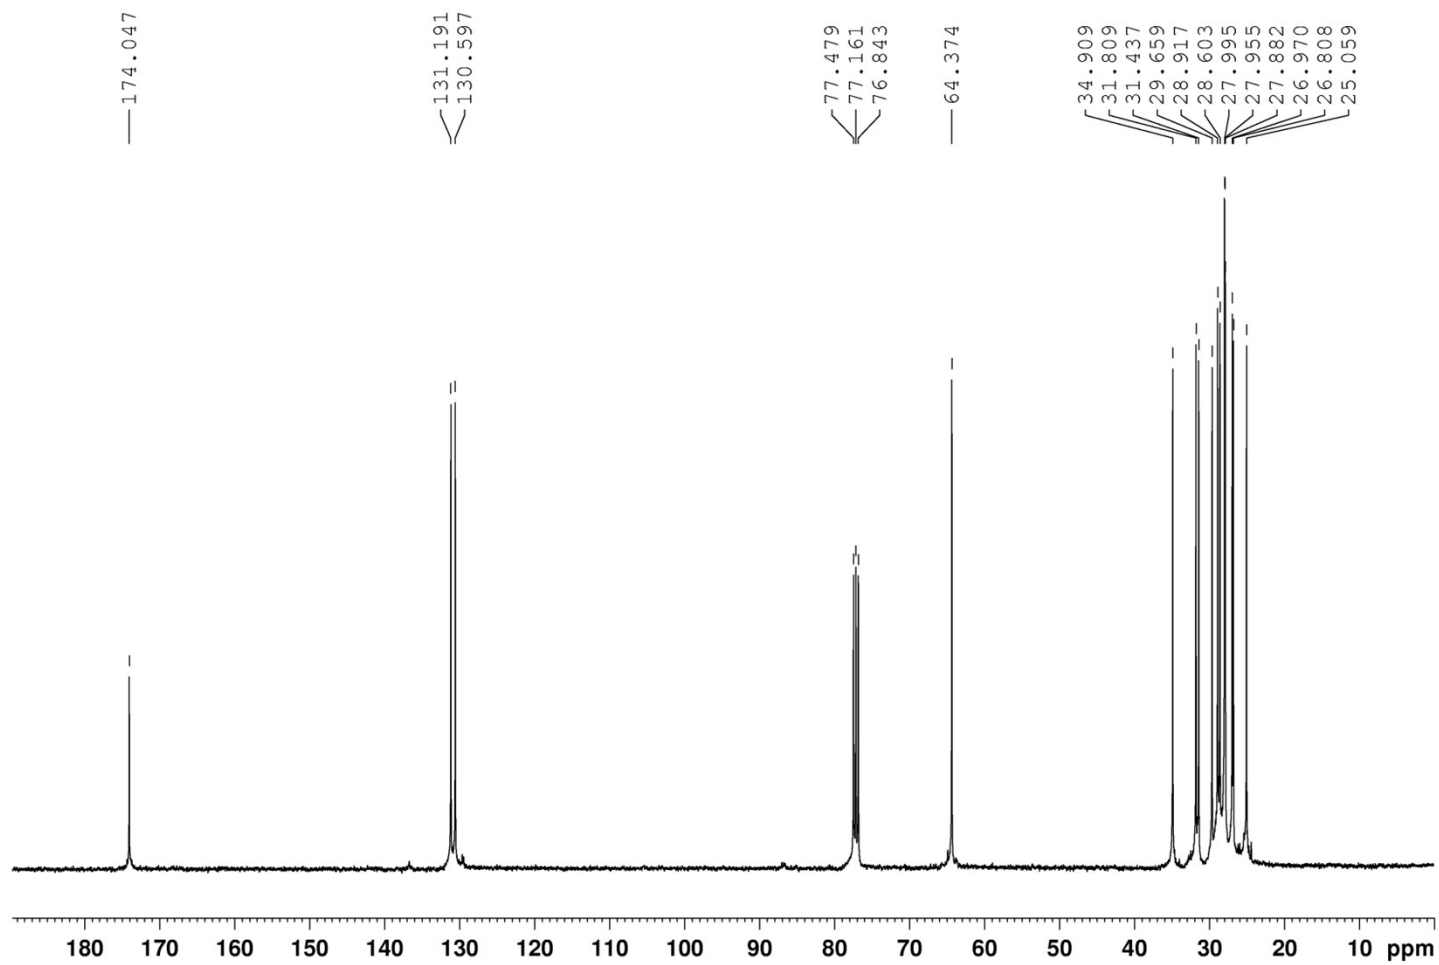

**Figure S2.**  $^{13}\text{C}$  NMR (100 MHz,  $\text{CDCl}_3$ , RT) of: 6- $\omega$ -hexadecenlactone.

**Table S1.** Polymerization of  $\omega$ -6-hexadecenlactone. <sup>a</sup>

| Run | [6HDL] <sub>0</sub> /[Cat]/[MeOH] <sup>b</sup> | T (°C) | t (h) | Conv (%) <sup>c</sup> | Yield (%) | M <sub>n,th</sub> <sup>d</sup> (kDa) | M <sub>n,NMR</sub> (kDa) |
|-----|------------------------------------------------|--------|-------|-----------------------|-----------|--------------------------------------|--------------------------|
| 9   | 100/1/0.5                                      | 100    | 27    | 33                    | 31        | 16.7                                 | 24.3                     |
| 10  | 100/1/2                                        | 100    | 27    | 41                    | 36        | 5.2                                  | 7.5                      |
| 11  | 100/1/4                                        | 100    | 27    | 36                    | 39        | 2.3                                  | 4.3                      |
| 12  | 10/1/1                                         | 100    | 18    | 87                    | nd        | 2.2                                  | 2.7                      |

Polymerization conditions: <sup>a</sup>Xylenes = 0.8 mL; precatalyst = 12 μmol. <sup>b</sup>Mol ratio of monomer to precatalyst to MeOH in the feed. <sup>c</sup>Determined by <sup>1</sup>H NMR from the  $\omega$ -methylene resonances of monomer and obtained polymer. <sup>d</sup>Calculated from  $([6HDL]_0/[MeOH]_0) \times \text{conv} \times 252.4$ .

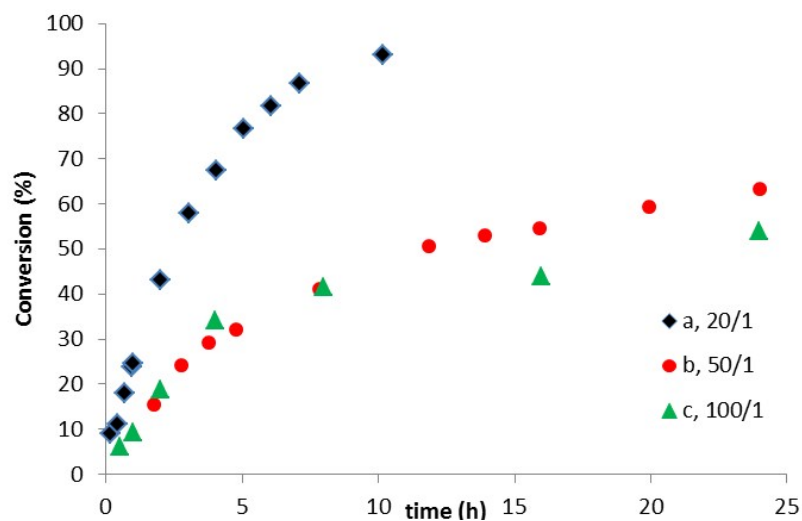**Figure S3.** Conversion (%) versus time (h) plot of ROP of  $\omega$ -6-hexadecenlactone determined by <sup>1</sup>H NMR spectra varying mol ratio of monomer to precatalyst in the feed. (a) [Cat] = 5 × 10<sup>-2</sup> M; [6HDL] = 1.0 M; [MeOH] = 2 × 10<sup>-2</sup> M; T = 80 °C; toluene-*d*<sub>8</sub> as solvent. (b) [Cat] = 2 × 10<sup>-2</sup> M; [6HDL] = 1.0 M; [MeOH] = 2 × 10<sup>-2</sup> M; T = 80 °C; toluene-*d*<sub>8</sub> as solvent. (c) [Cat] = 1.5 × 10<sup>-2</sup> M; [6HDL] = 1.5 M; [MeOH] = 1.5 × 10<sup>-2</sup> M; T = 100 °C; xylenes as solvent.

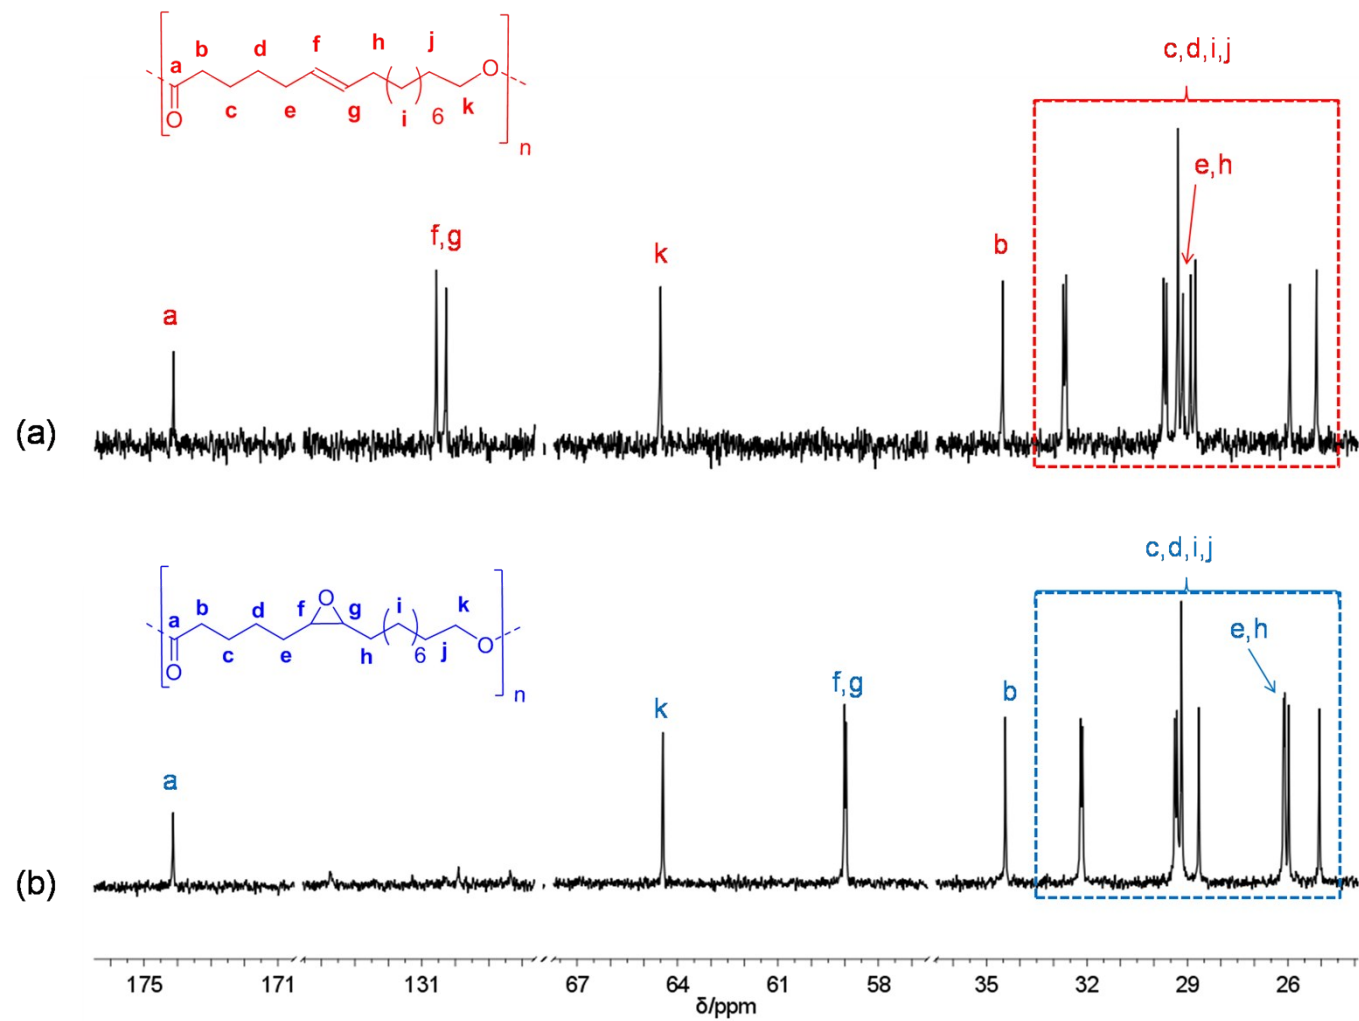

**Figure S4.**  $^{13}\text{C}$  NMR (75 MHz,  $\text{CDCl}_3$ , RT) of: poly(6- $\omega$ -hexadecenlactone) and poly(6,7-epoxy- $\omega$ -hexadecalactone) (**b**).



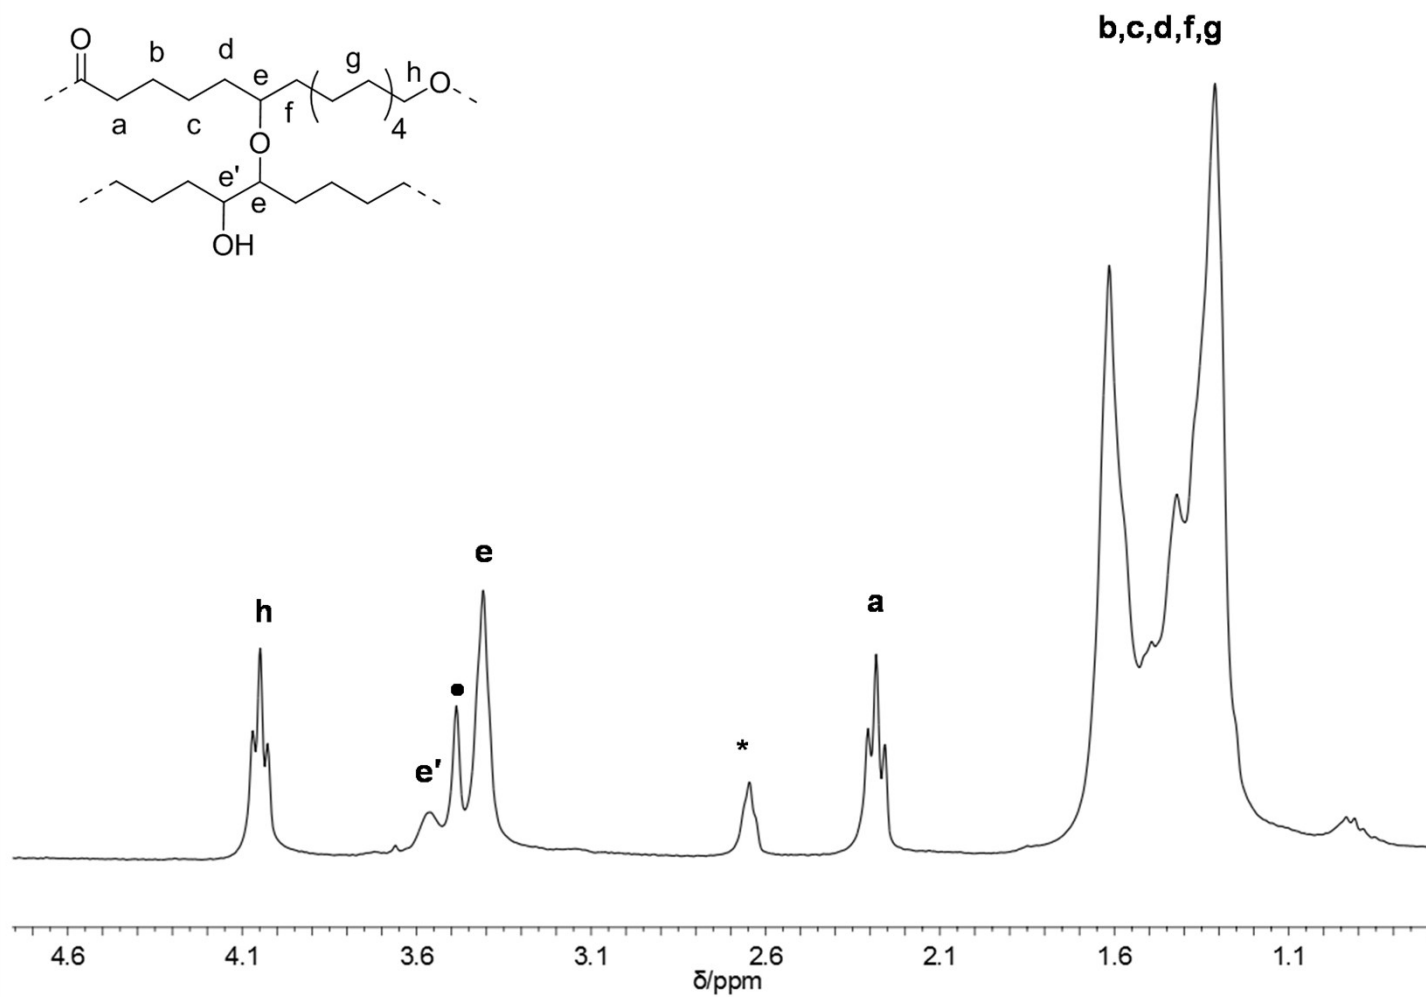

**Figure S5.**  $^1\text{H}$  NMR (300 MHz,  $\text{CDCl}_3$ , RT) spectrum of poly(hydroxy- $\omega$ -hexadecalactone) (**c**). \*: traces of starting poly(6,7-epoxy- $\omega$ -hexadecalactone). •: methanol.

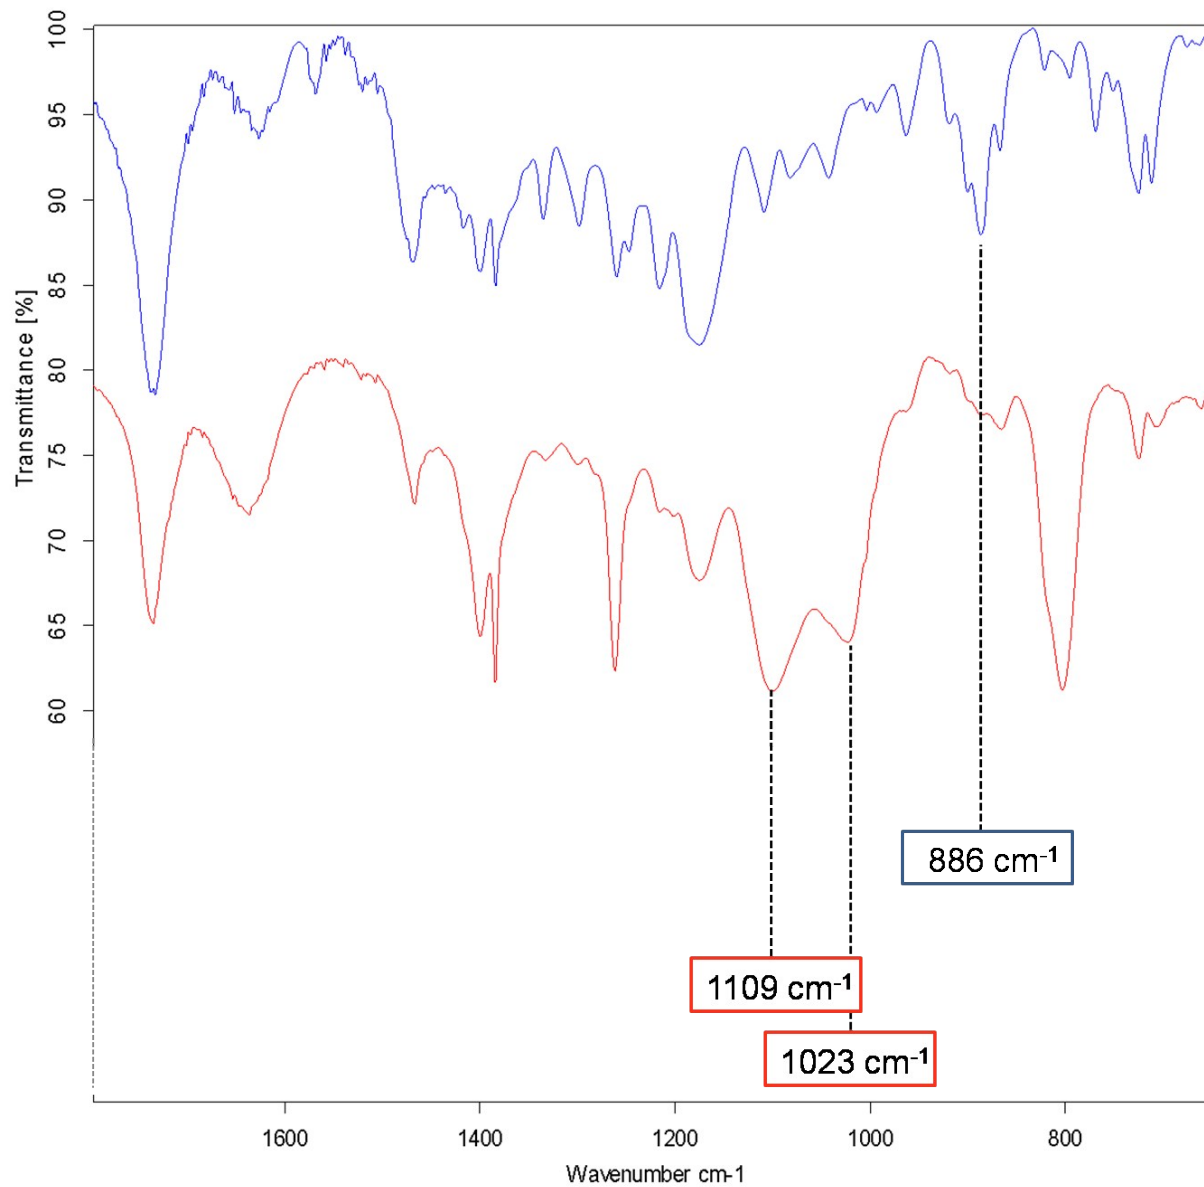

**Figure S6.** FT-IR spectrum of: (top, blue) poly(6,7-epoxy- $\omega$ -hexadecalactone) (**b**) and (bottom, red) poly(hydroxy- $\omega$ -hexadecalactone) (**c**).

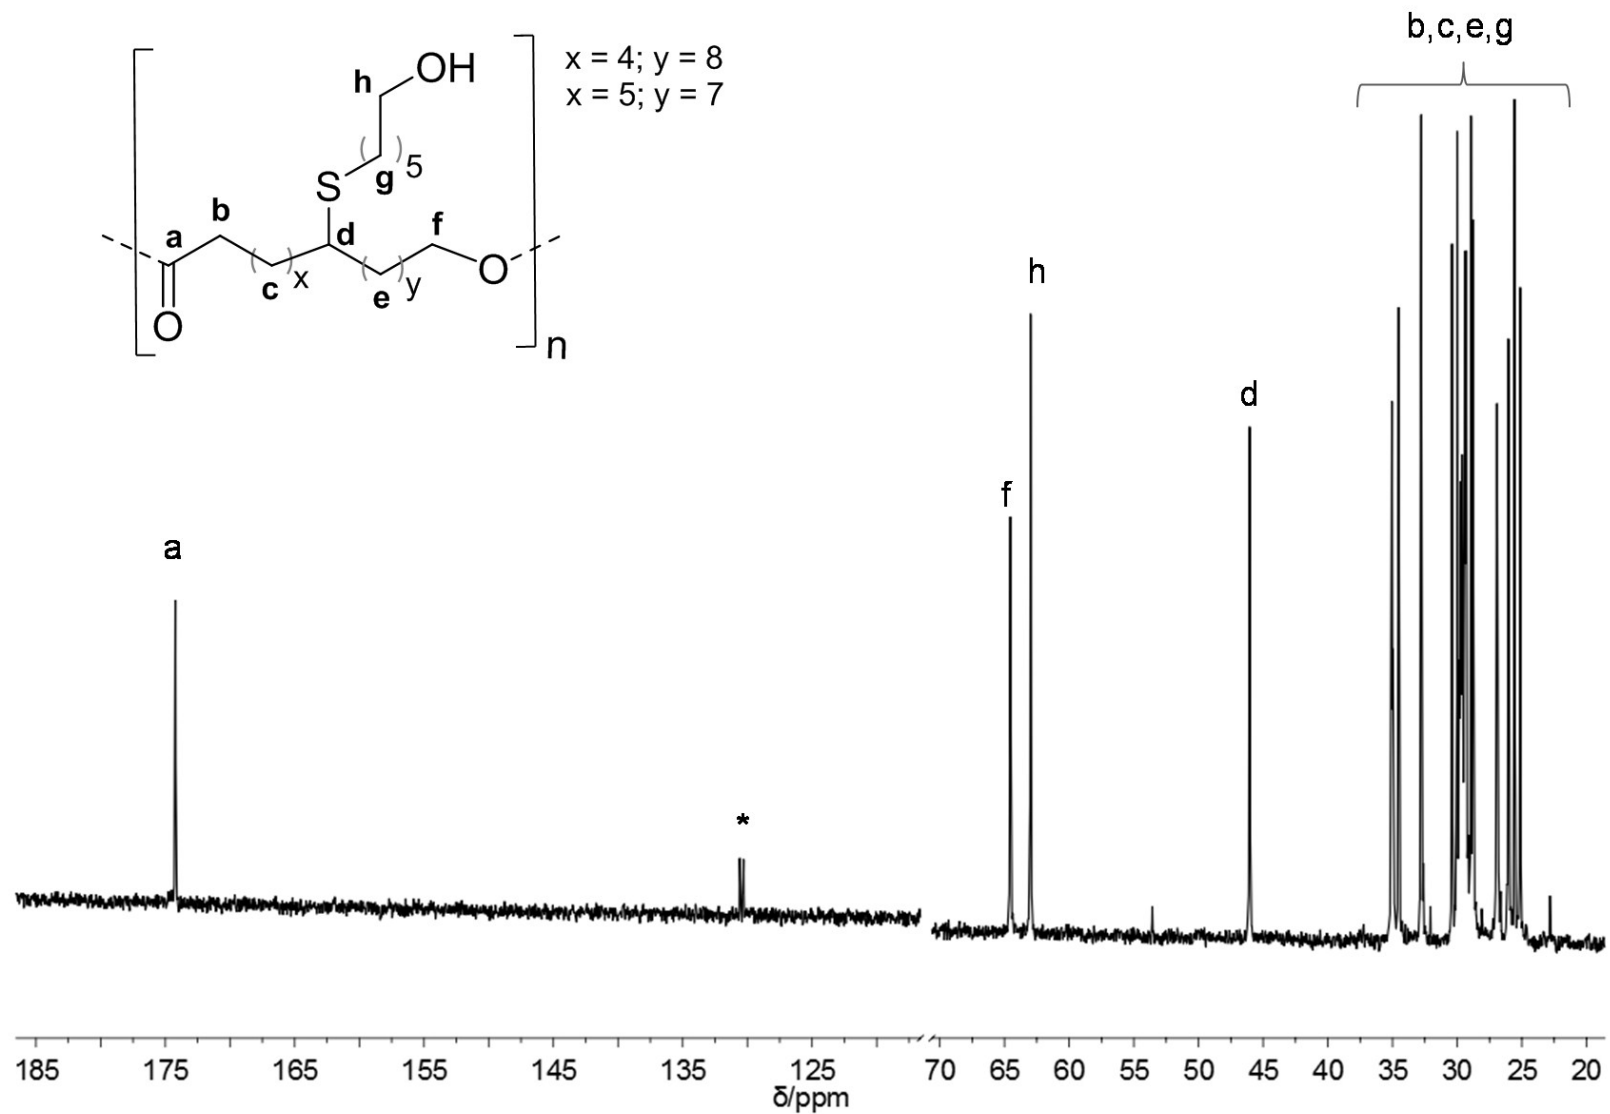

**Figure S7.**  $^{13}\text{C}$  NMR (75 MHz,  $\text{CDCl}_3$ , RT) spectrum of poly( $\omega$ -hexadecalactone) with 6-mercapto-1-hexanol groups (*d*). \*: double bond carbons of starting poly(6- $\omega$ -hexadecenlactone).

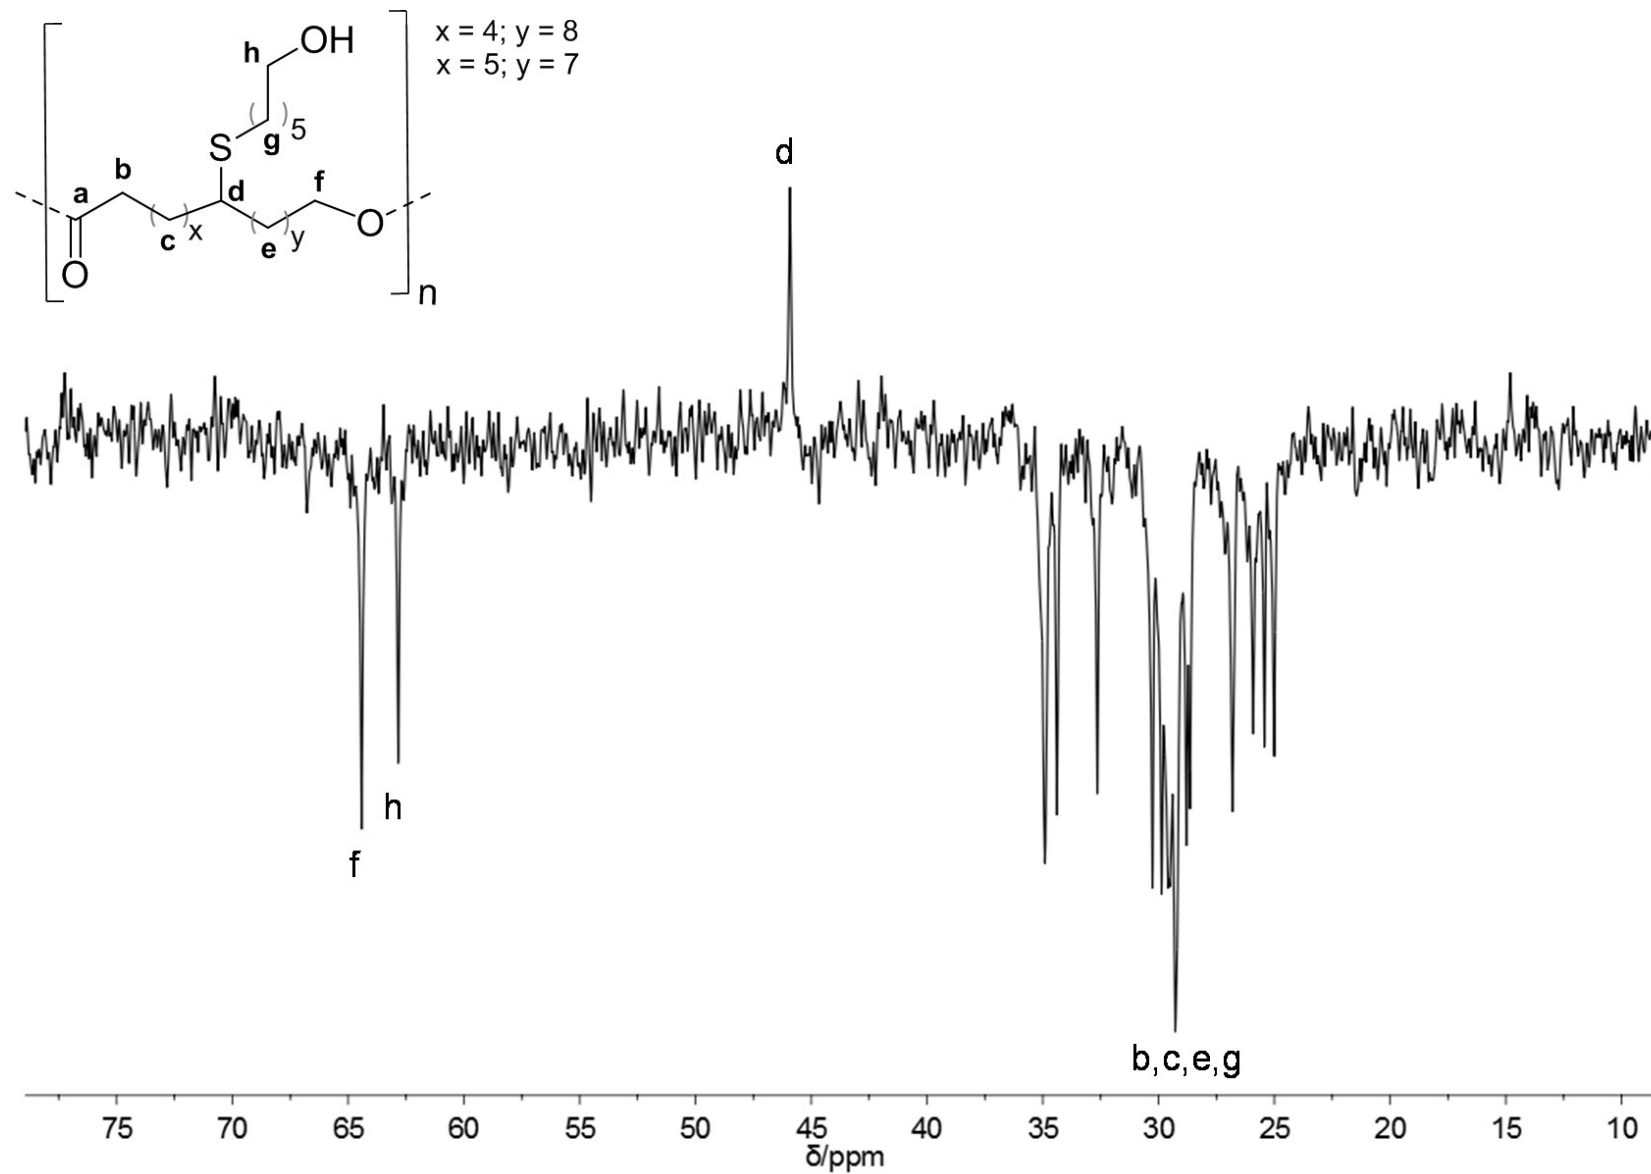

**Figure S8.** DEPT-135 NMR (75 MHz,  $\text{CDCl}_3$ , RT) spectrum of poly( $\omega$ -hexadecalactone) with 6-mercapto-1-hexanol groups ( $d$ ).

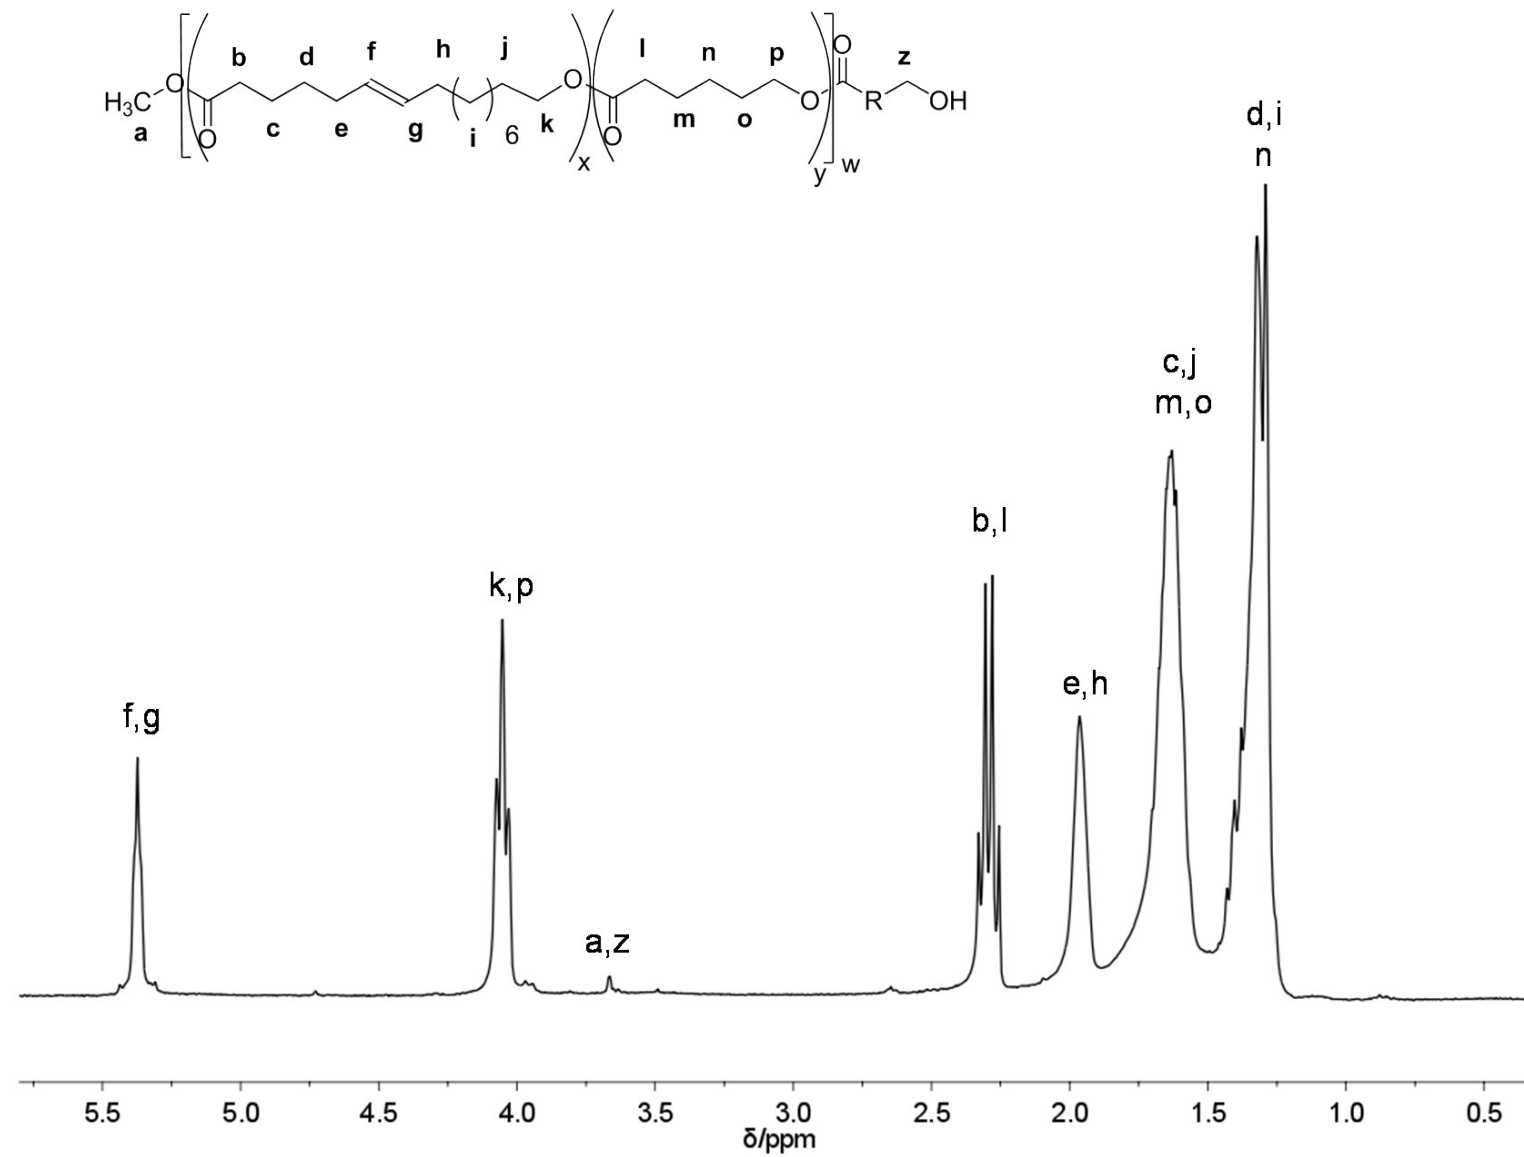

**Figure S9.** <sup>1</sup>H NMR (400 MHz, CDCl<sub>3</sub>, RT) of poly[(6- $\omega$ -hexadecenlactone)-*ran*-( $\epsilon$ -caprolactone)].

**Table S2.** Di-block copolymerization experiments.

| Polymer sample                            | $F_{\text{HDL}}^a$ | $F_{\text{CL}}^a$ | $F_{\text{LA}}^a$ | $L_{\text{HDL}}^a$ | $L_{\text{LA}}^a$ | $L_{\text{CL}}^a$ | $M_n^{\text{NMR}}$<br>(kDa) <sup>a</sup> | $M_n^{\text{GPC}}$<br>(kDa) <sup>b</sup> | $M_w/M_n^b$ | $T_m$ (°C) <sup>c</sup> | $\Delta H_m$<br>(Jg <sup>-1</sup> ) <sup>c</sup> |
|-------------------------------------------|--------------------|-------------------|-------------------|--------------------|-------------------|-------------------|------------------------------------------|------------------------------------------|-------------|-------------------------|--------------------------------------------------|
| PCL                                       | -                  | 100               | -                 | -                  | -                 | -                 | 8.5                                      | 23.4                                     | 1.5         | 56.1                    | 76.6                                             |
| PHDL- <i>block</i> -PCL                   | 19                 | 81                | -                 | 34                 | -                 | 120               | 22.3                                     | 37.5                                     | 1.9         | 55.6                    | 78.4                                             |
| PHDL- <i>block</i> -PCL'                  | 62.5               | 37.5              | -                 | 33                 | -                 | 20                | 10.6                                     | 19.1                                     | 2.4         | 54.1                    | 93.4                                             |
| PHDL- <i>block</i> -PLA                   | 35                 | -                 | 65                | 66                 | 125               | -                 | 28.4                                     | 24.3                                     | 1.5         | 49.3                    | 37.2                                             |
| P(HDL- <i>ran</i> -CL)- <i>block</i> -PLA | 22                 | 43                | 35                | 1.7                | 58                | 2.9               | 26.5                                     | 29.1                                     | 2.0         | 38.8                    | 46.9                                             |

<sup>a</sup>Determined by <sup>1</sup>H NMR spectra. <sup>b</sup>Determined by GPC in THF vs polystyrene standards. <sup>c</sup>Value reported for the second heating cycle.

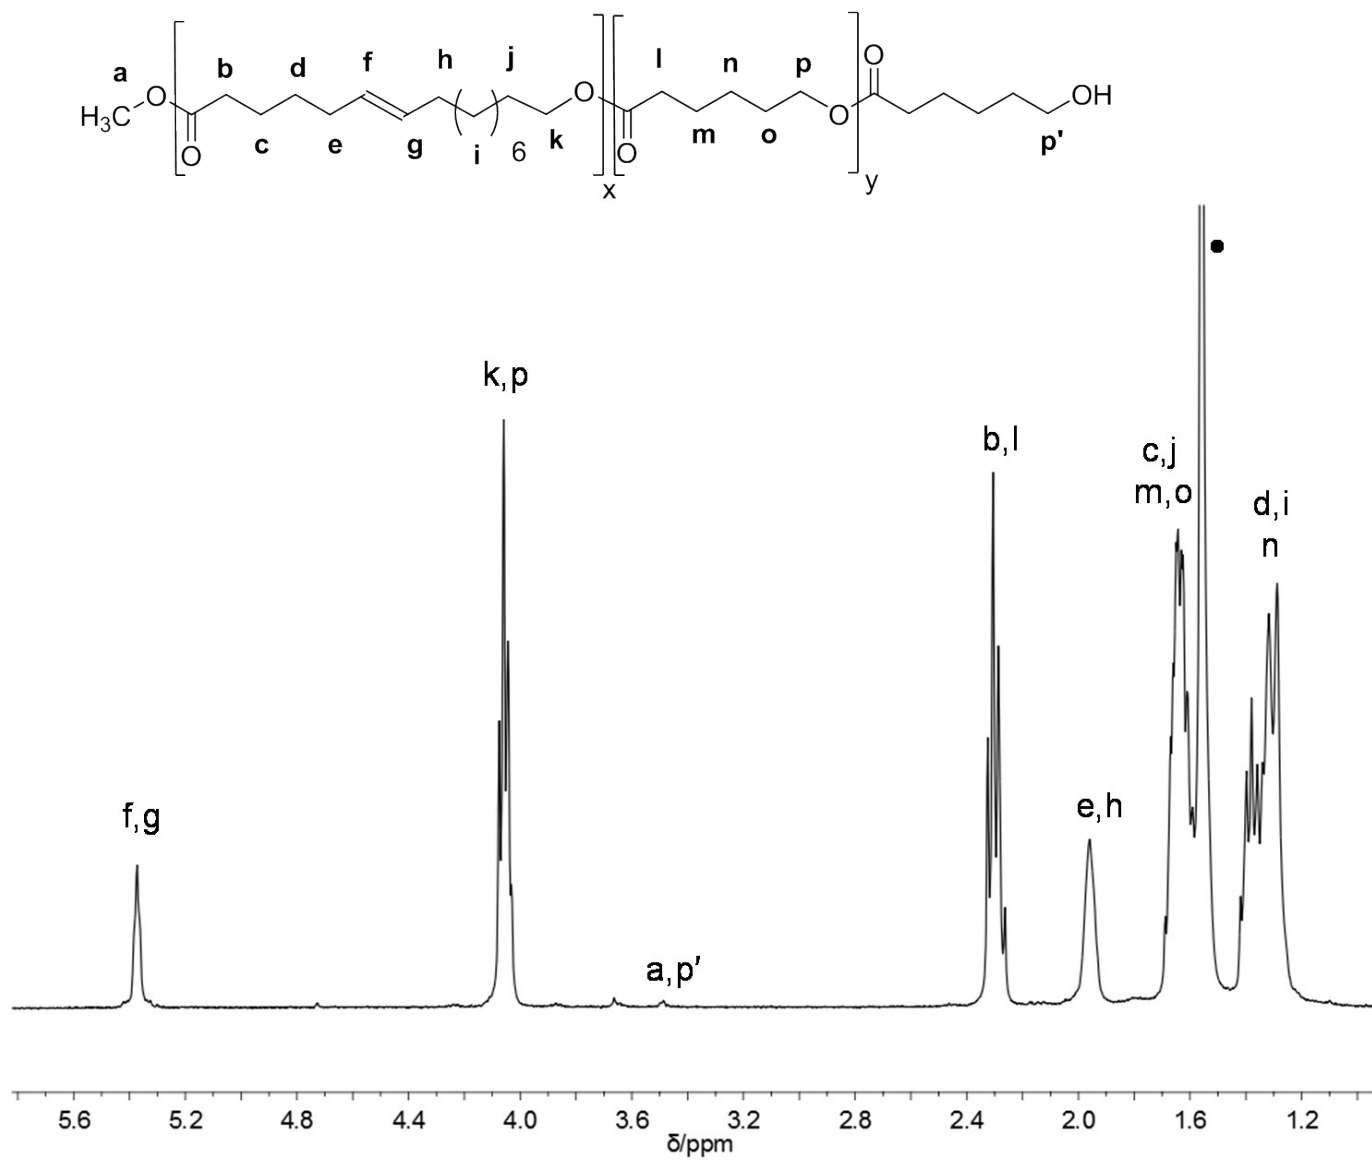

**Figure S10.**  $^1\text{H}$  NMR (300 MHz, CDCl<sub>3</sub>, RT) of poly(6- $\omega$ -hexadecenlactone)-*block*-poly( $\epsilon$ -caprolactone). •: adventitious water.

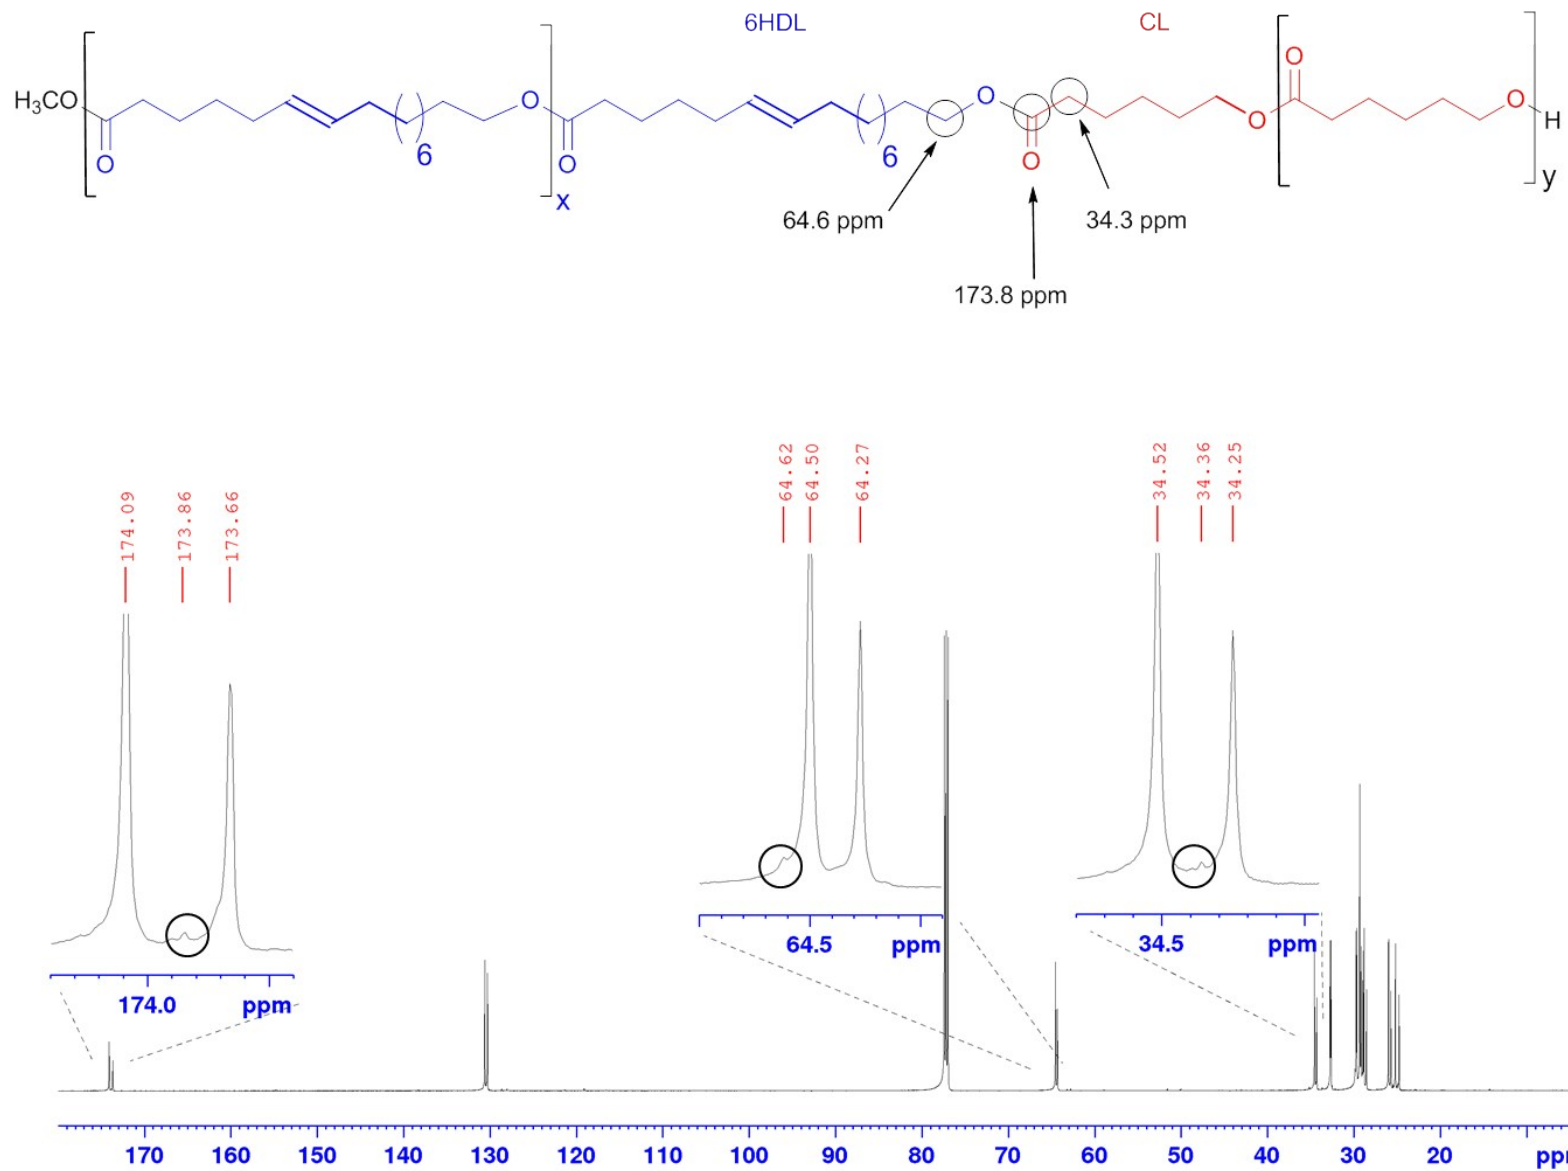

**Figure S11.** <sup>13</sup>C NMR (600 MHz, CDCl<sub>3</sub>, RT) of poly(6- $\omega$ -hexadecenlactone)-*block*-poly( $\epsilon$ -caprolactone) (sample PHDL-*block*-PCL', Table S2).



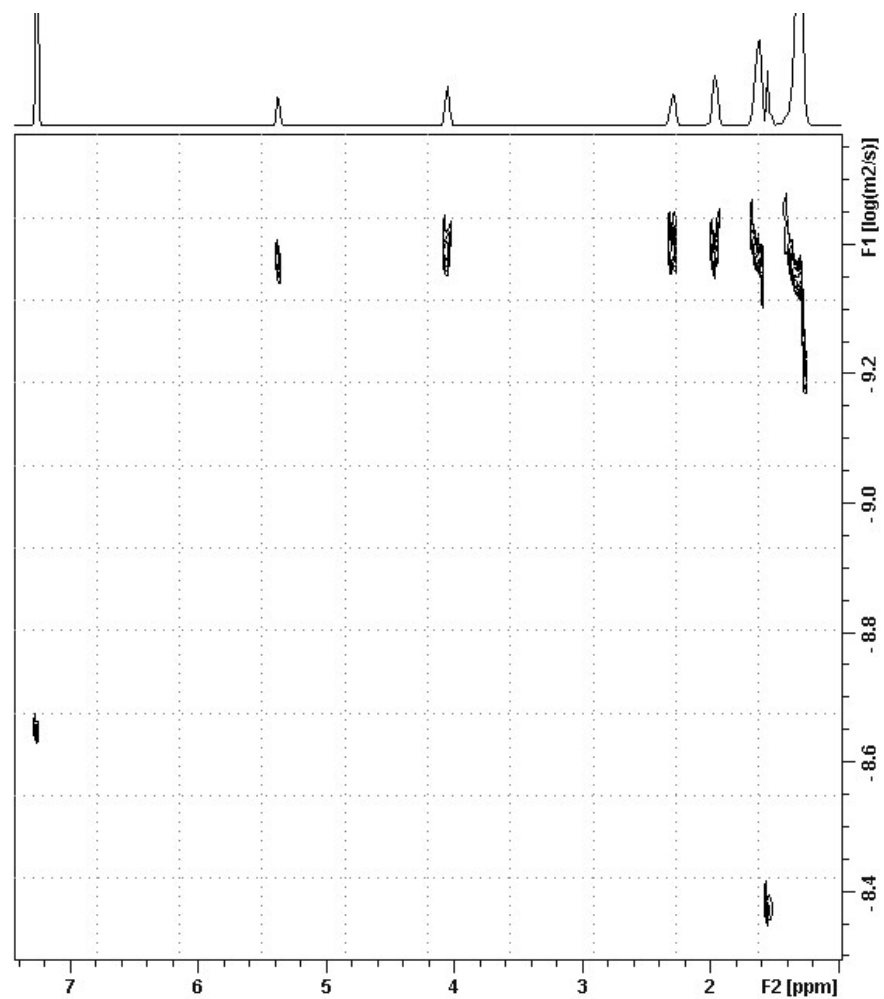

**Figure S12.** 2D DOSY NMR (400 MHz, CDCl<sub>3</sub>, RT) of poly(6- $\omega$ -hexadecenlactone)-*block*-( $\epsilon$ -caprolactone), recorded employing  $\delta = 1700 \mu\text{s}$  and  $\Delta = 0.1 \text{ s}$ . Signals at 7.26, 1.56 and 1.26 ppm are relative to deuterated solvent residual protic signal (CHCl<sub>3</sub>), adventitious water and *n*-heptane, respectively.

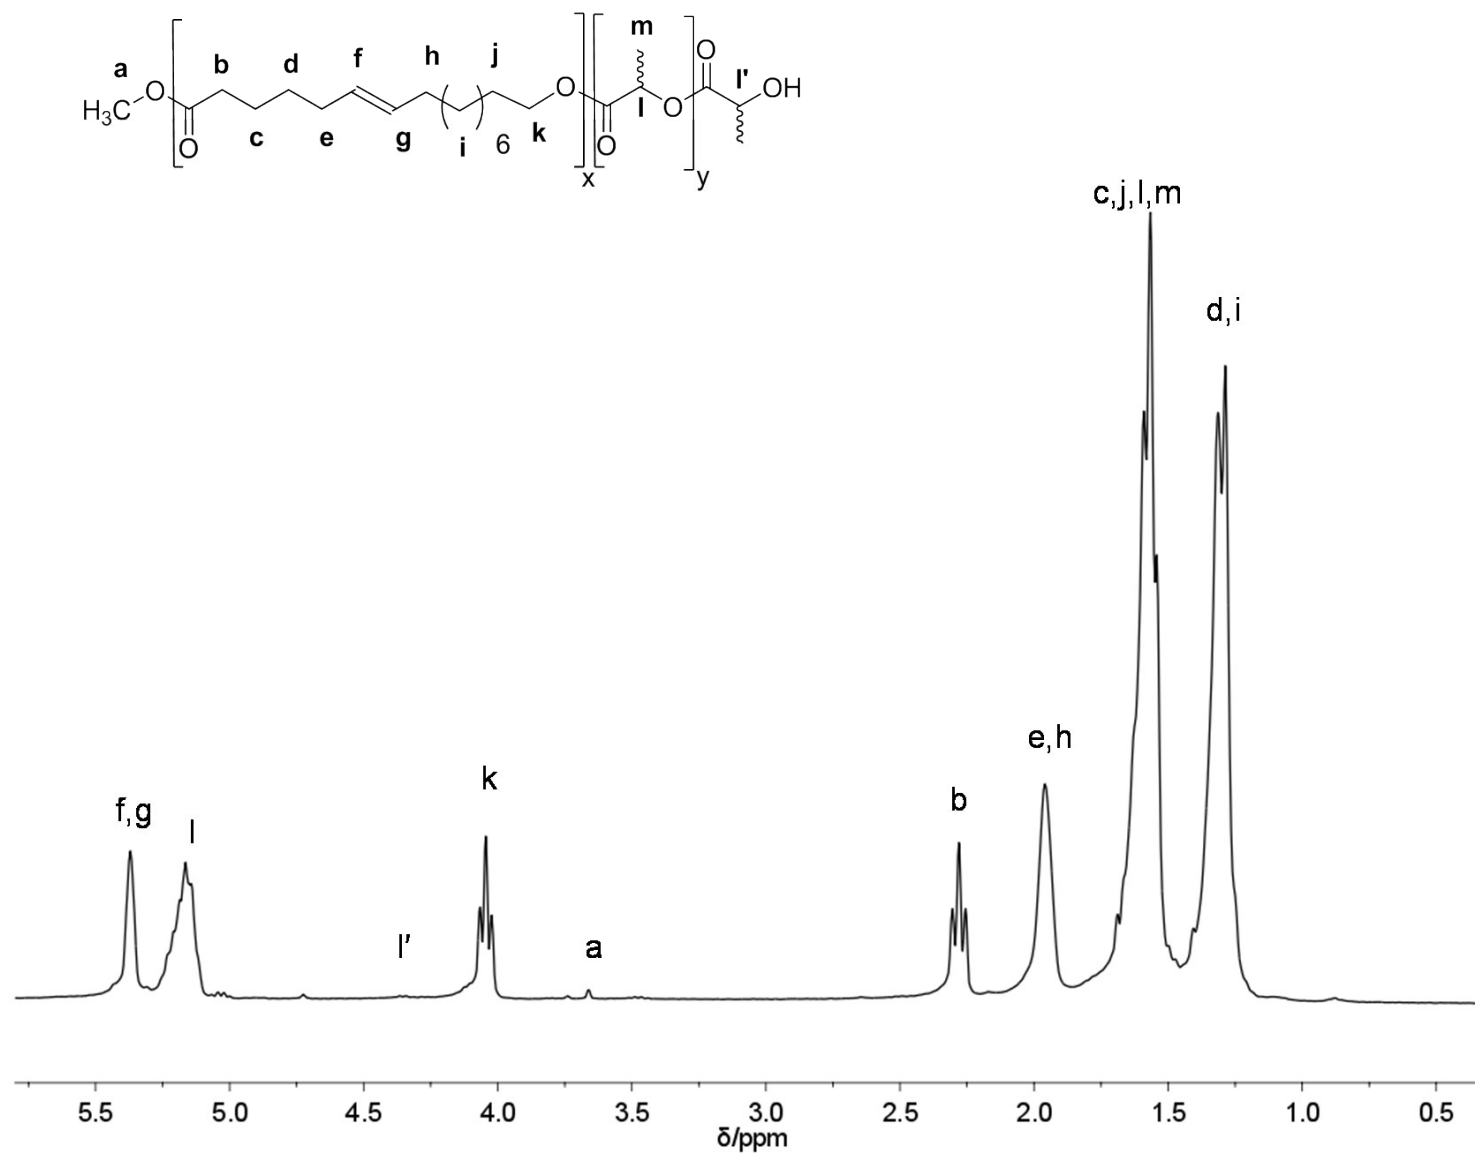

**Figure S13.**  $^1\text{H}$  NMR (300 MHz,  $\text{CDCl}_3$ , RT) of poly(6- $\omega$ -hexadecenlactone)-*block*-poly(*rac*-lactide).

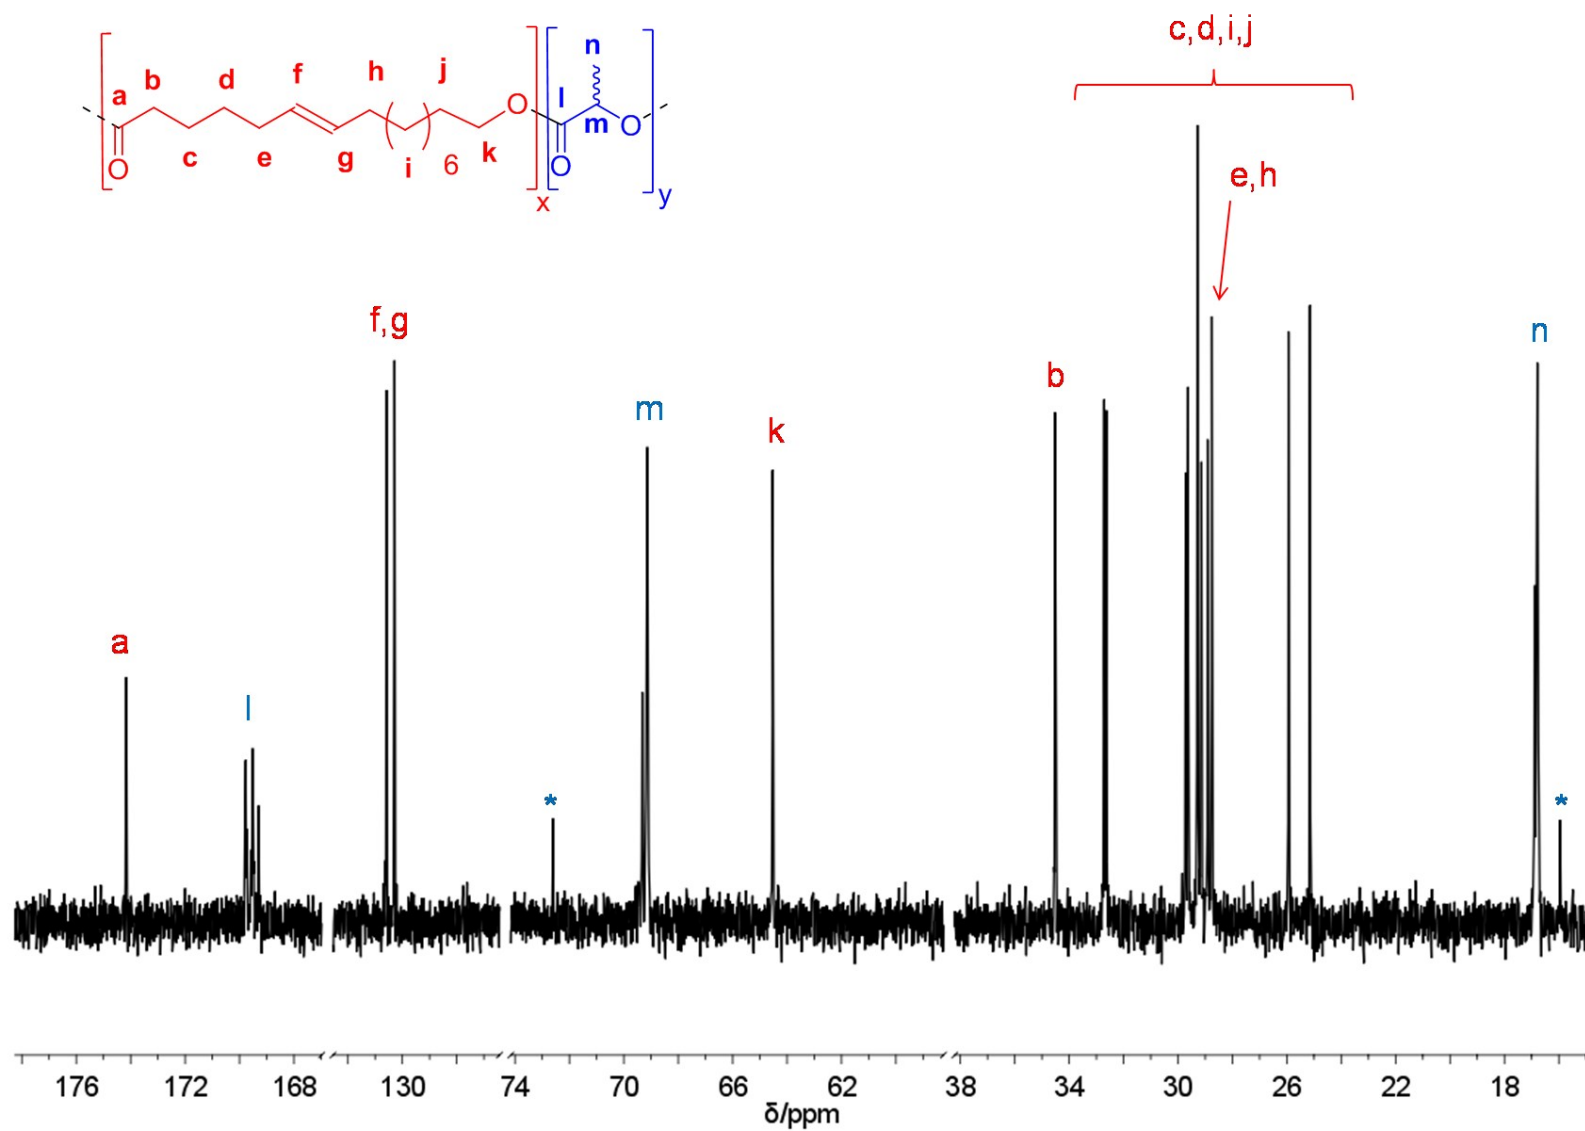

**Figure S14.**  $^{13}\text{C}$  NMR (75 MHz,  $\text{CDCl}_3$ , RT) of poly(6- $\omega$ -hexadecenlactone)-*block*-poly(*rac*-lactide). \*: *rac*-lactide monomer.

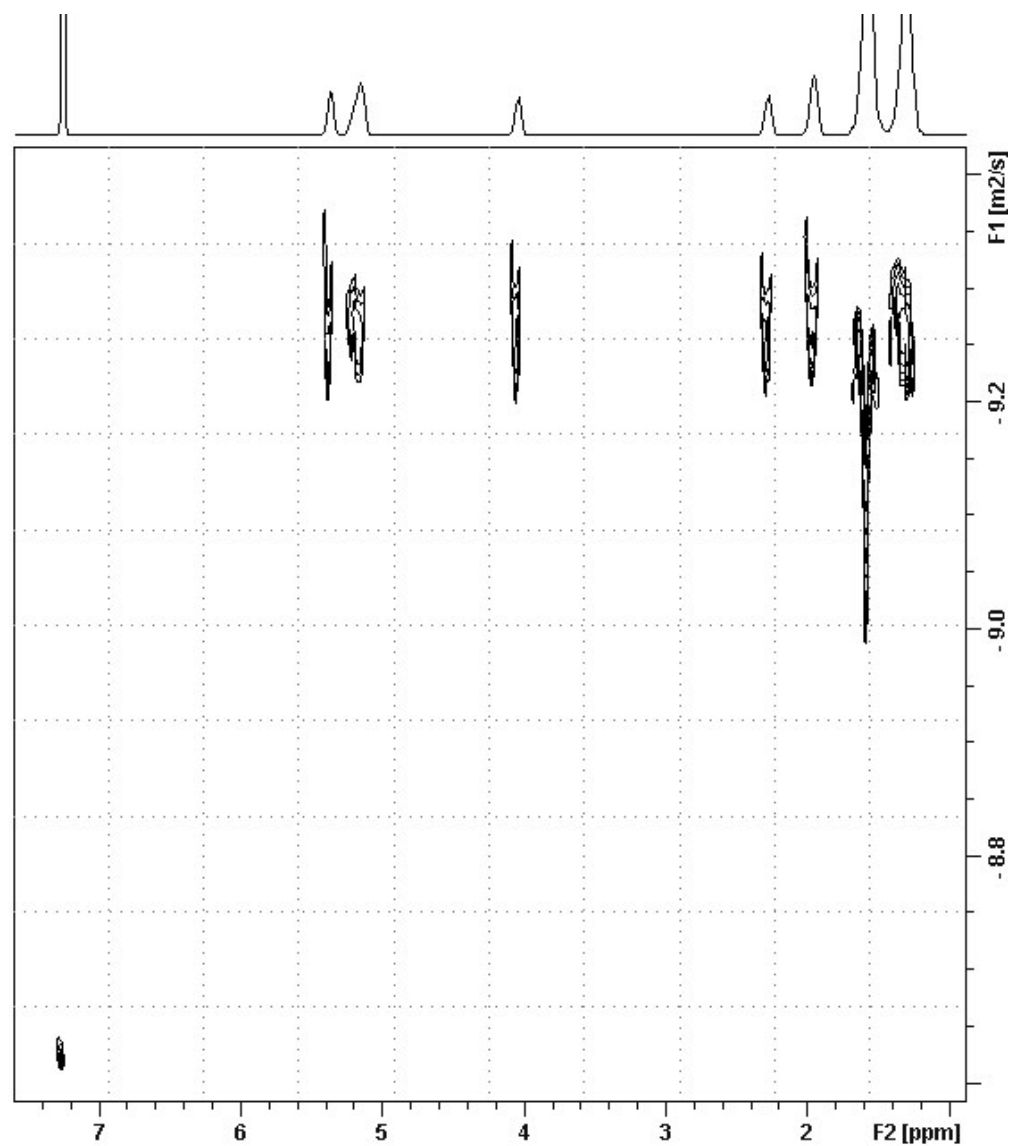

**Figure S15.** 2D DOSY NMR (400 MHz, CDCl<sub>3</sub>, RT) of poly(6- $\omega$ -hexadecenlactone)-*block*-poly(*rac*-lactide), recorded employing  $\delta = 1000 \mu\text{s}$  and  $\Delta = 0.5 \text{ s}$ . Signals at 7.26 and 1.56 ppm are relative to deuterated solvent residual protic signal (CHCl<sub>3</sub>) and to adventitious water, respectively.

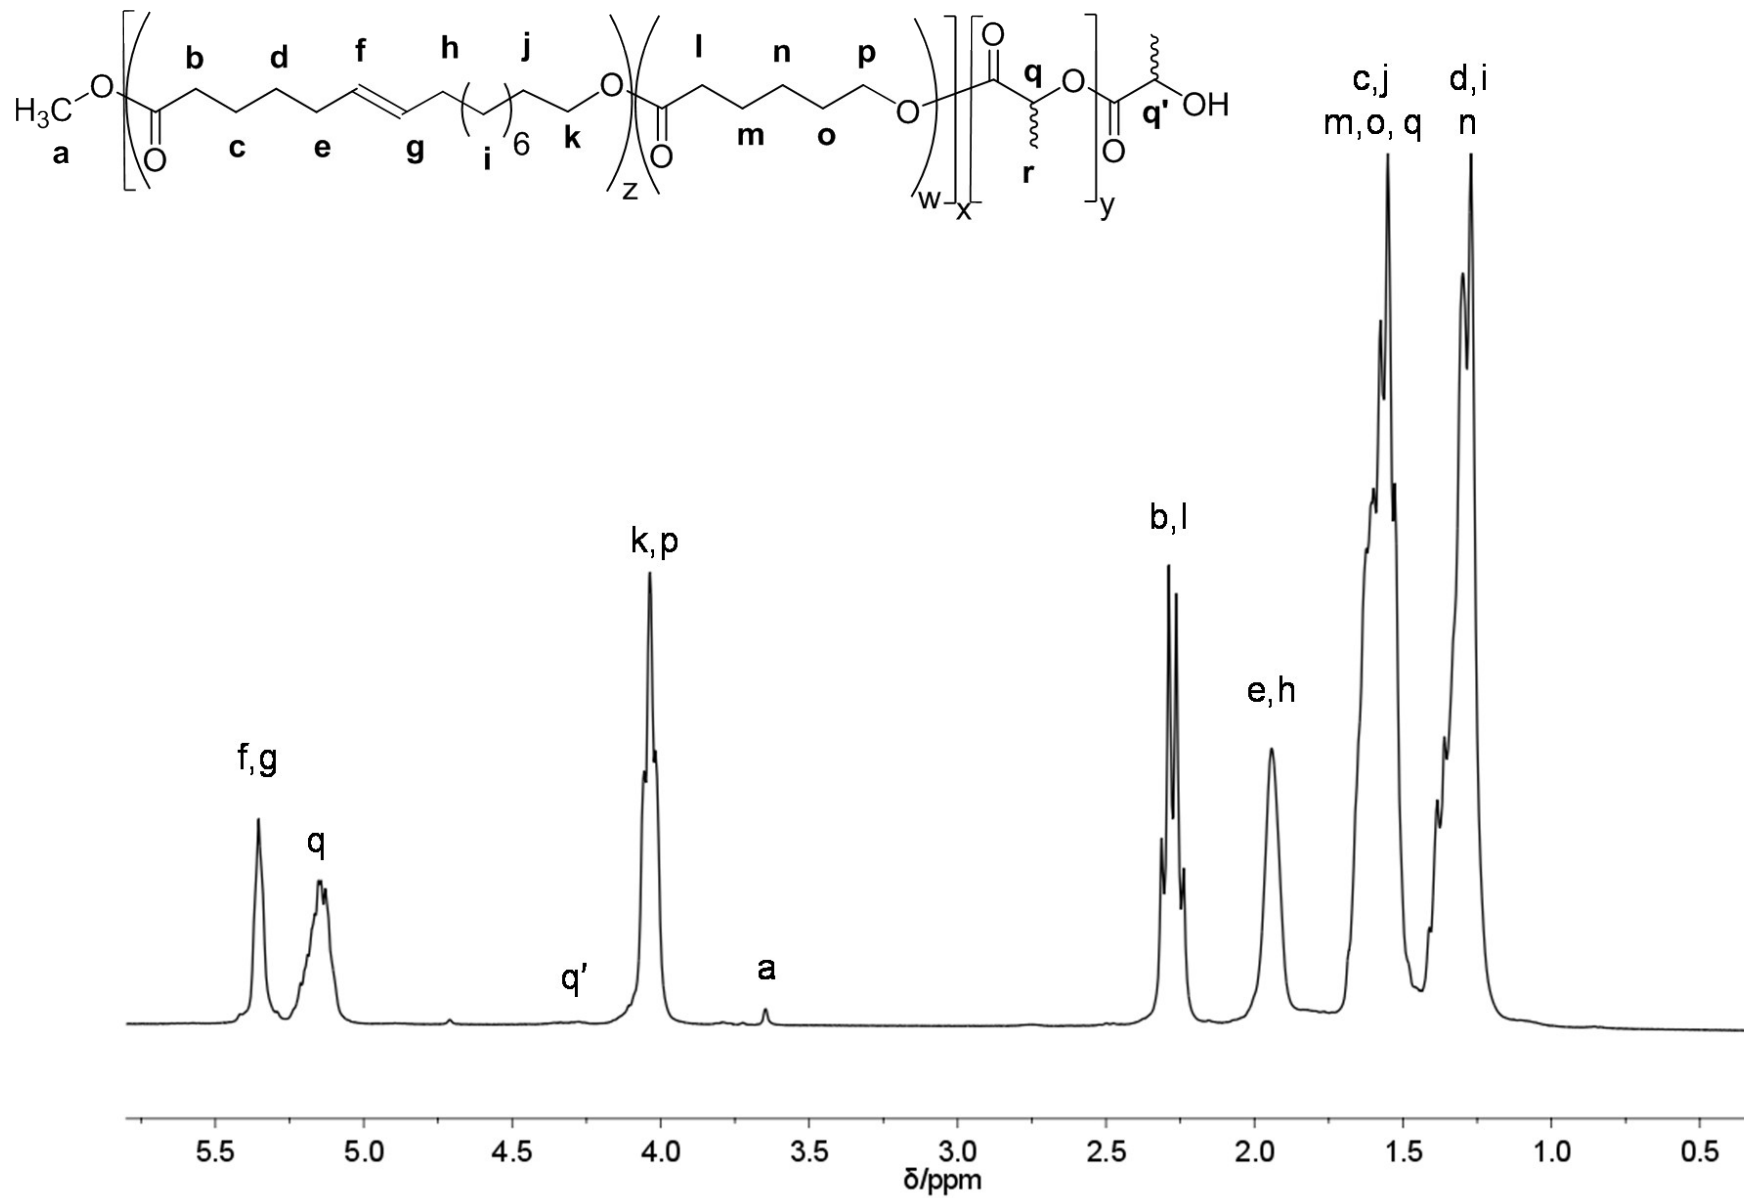

**Figure S16.** <sup>1</sup>H NMR (300 MHz, CDCl<sub>3</sub>, RT) of poly[(6- $\omega$ -hexadecenlactone)-*ran*-( $\epsilon$ -caprolactone)]-*block*-poly(*rac*-lactide).

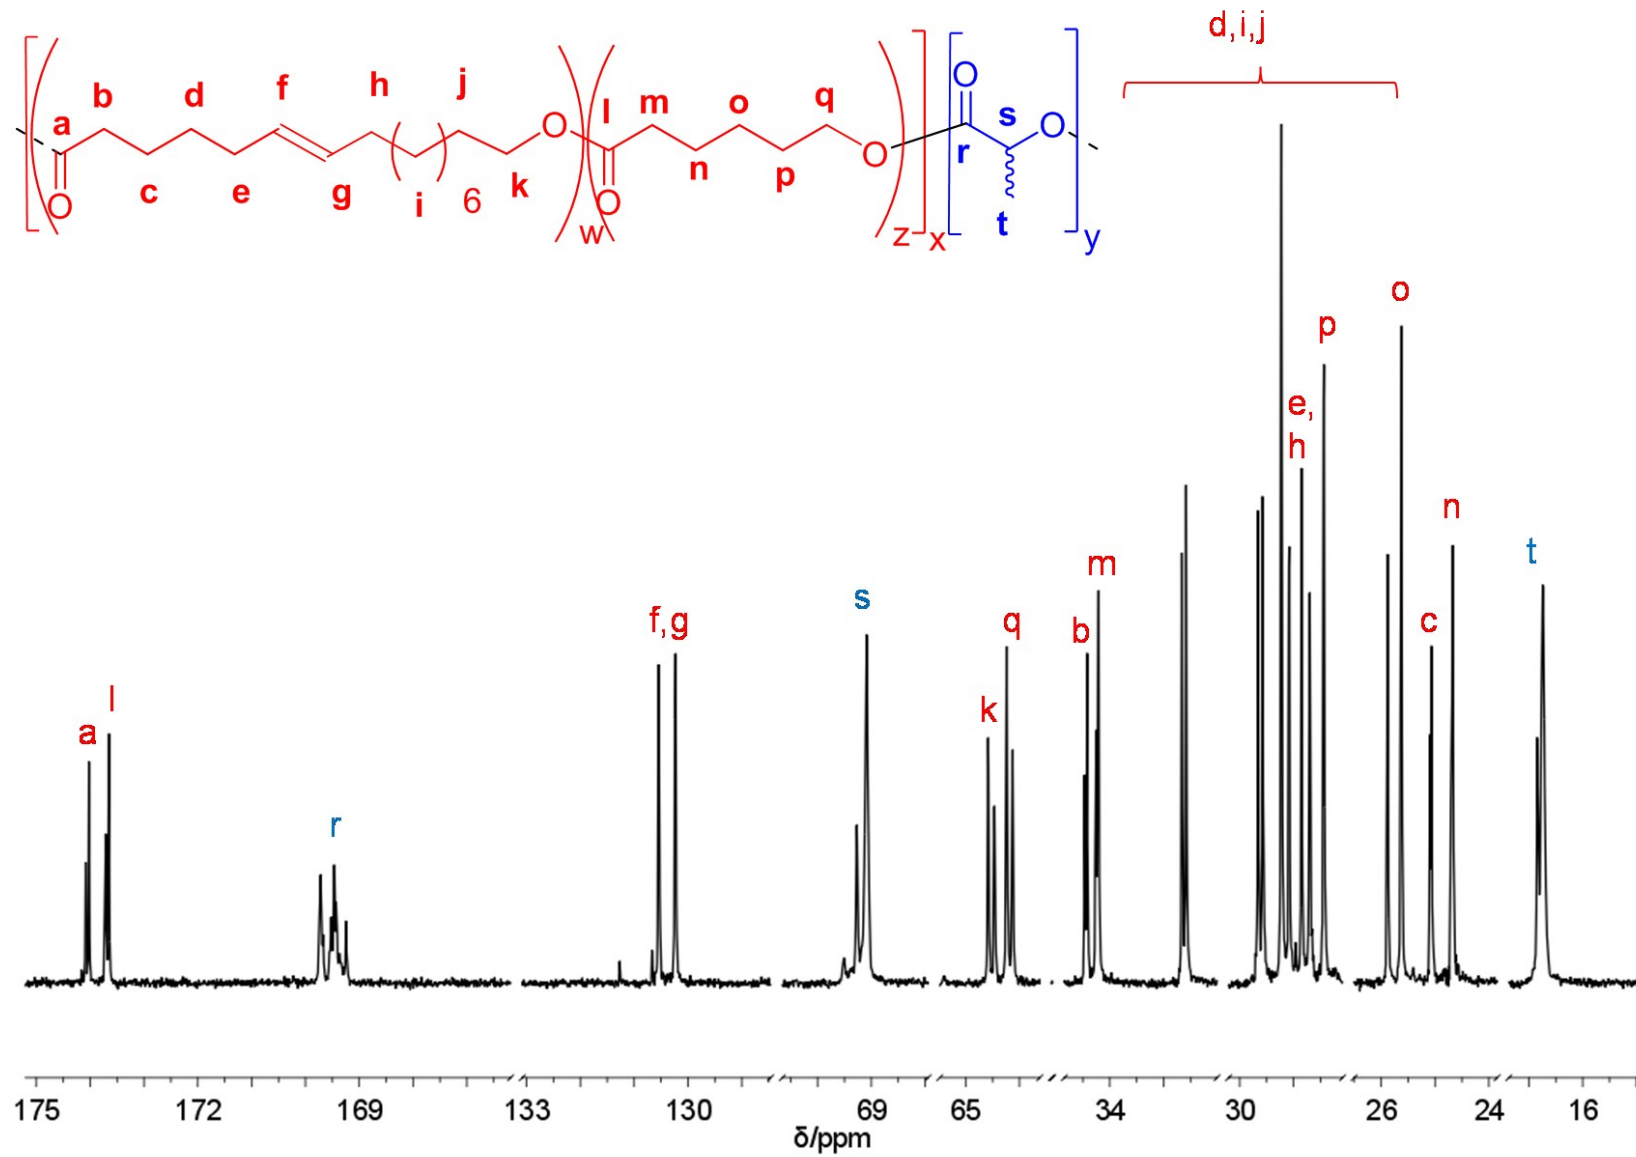

**Figure S17.** <sup>13</sup>C NMR (75 MHz, CDCl<sub>3</sub>, RT) of poly[(6-ω-hexadecenlactone)-*ran*-(ε-caprolactone)]-*block*-poly(*rac*-lactide).

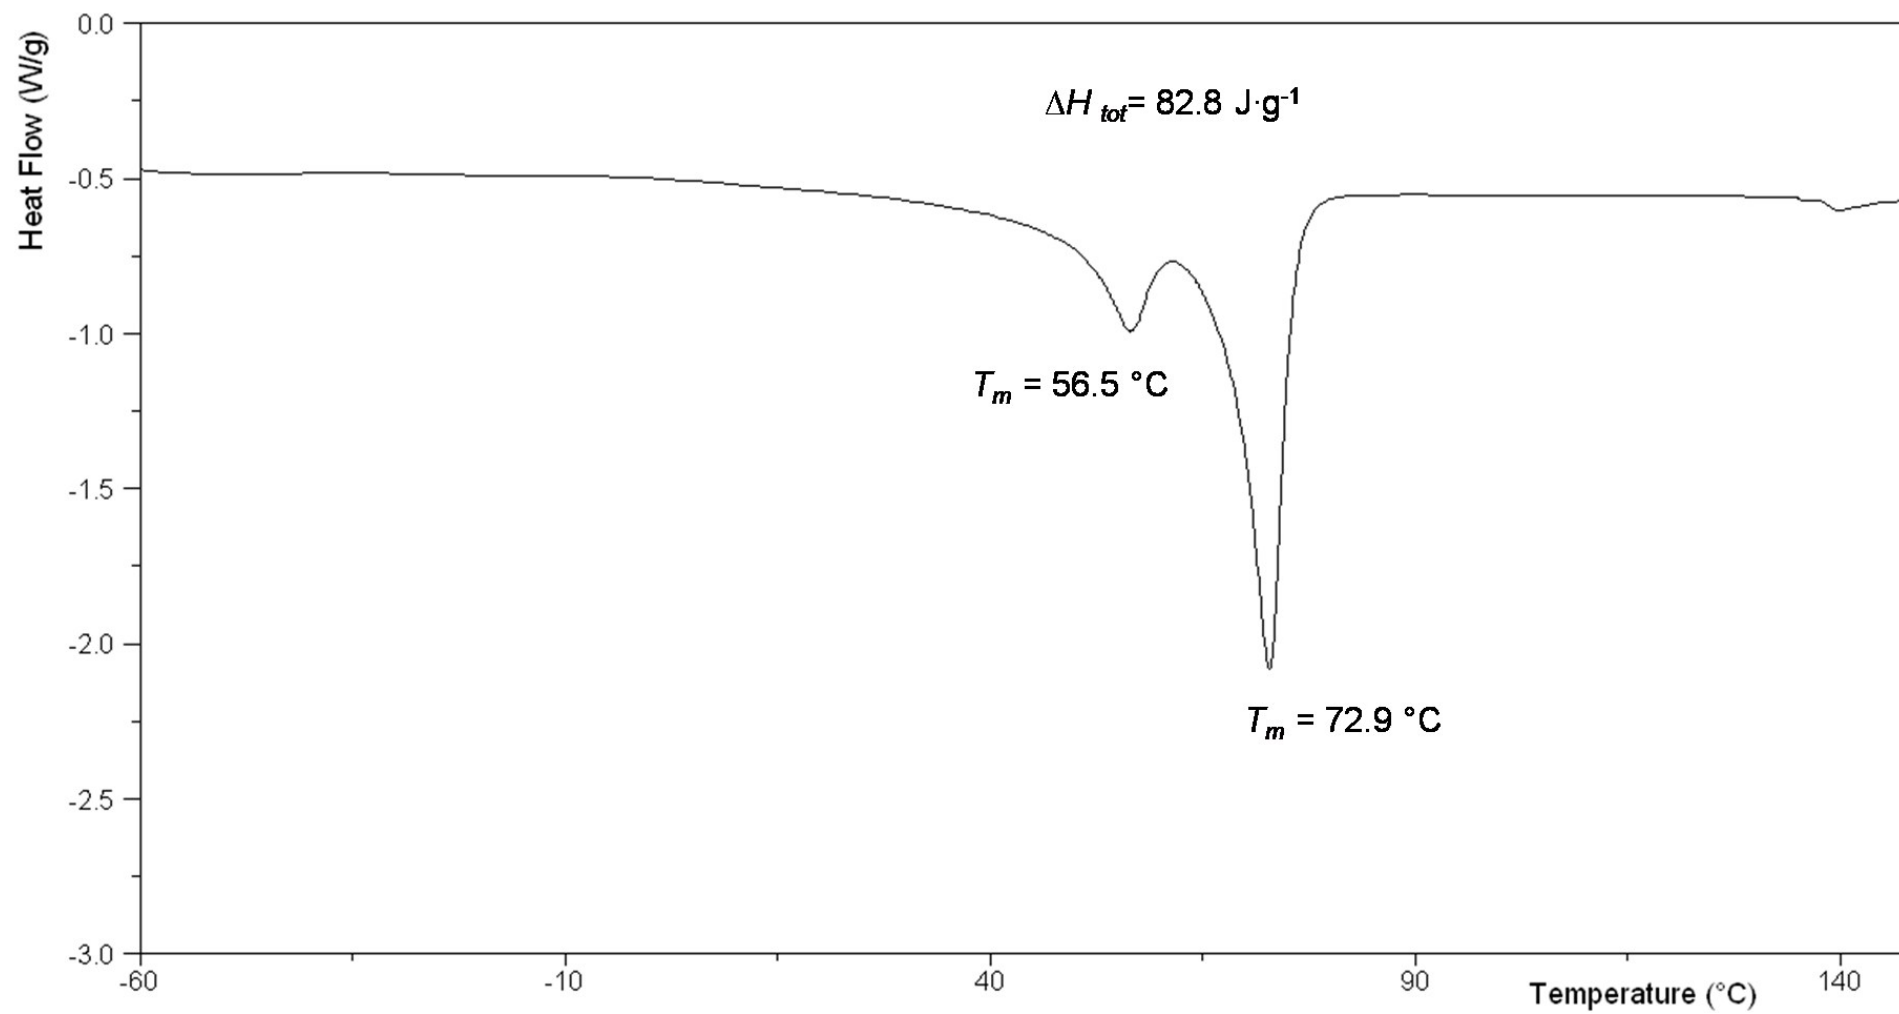

**Figure S18.** DSC thermogram (II run) of poly(6,7-epoxy- $\omega$ -hexadecalactone) (**b**).

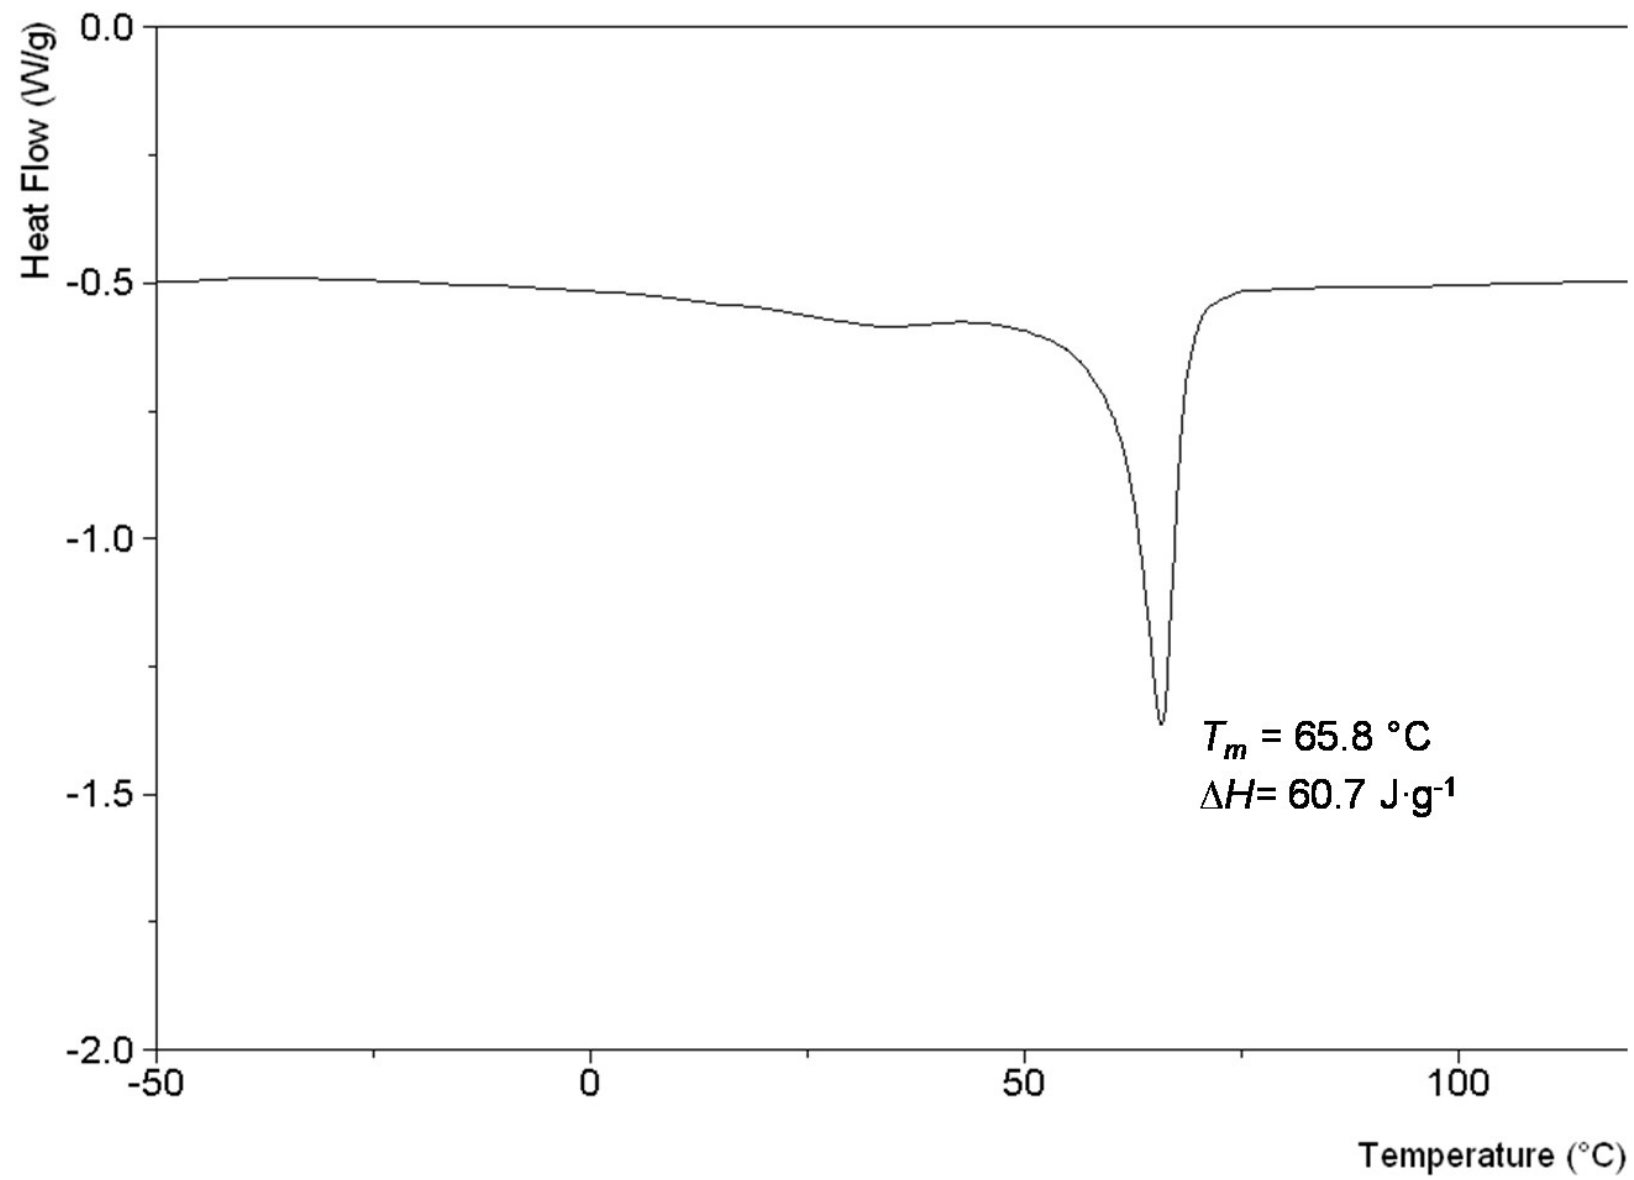

**Figure S19.** DSC thermogram (II run) of poly(hydroxy- $\omega$ -hexadecanlactone) (*c*).



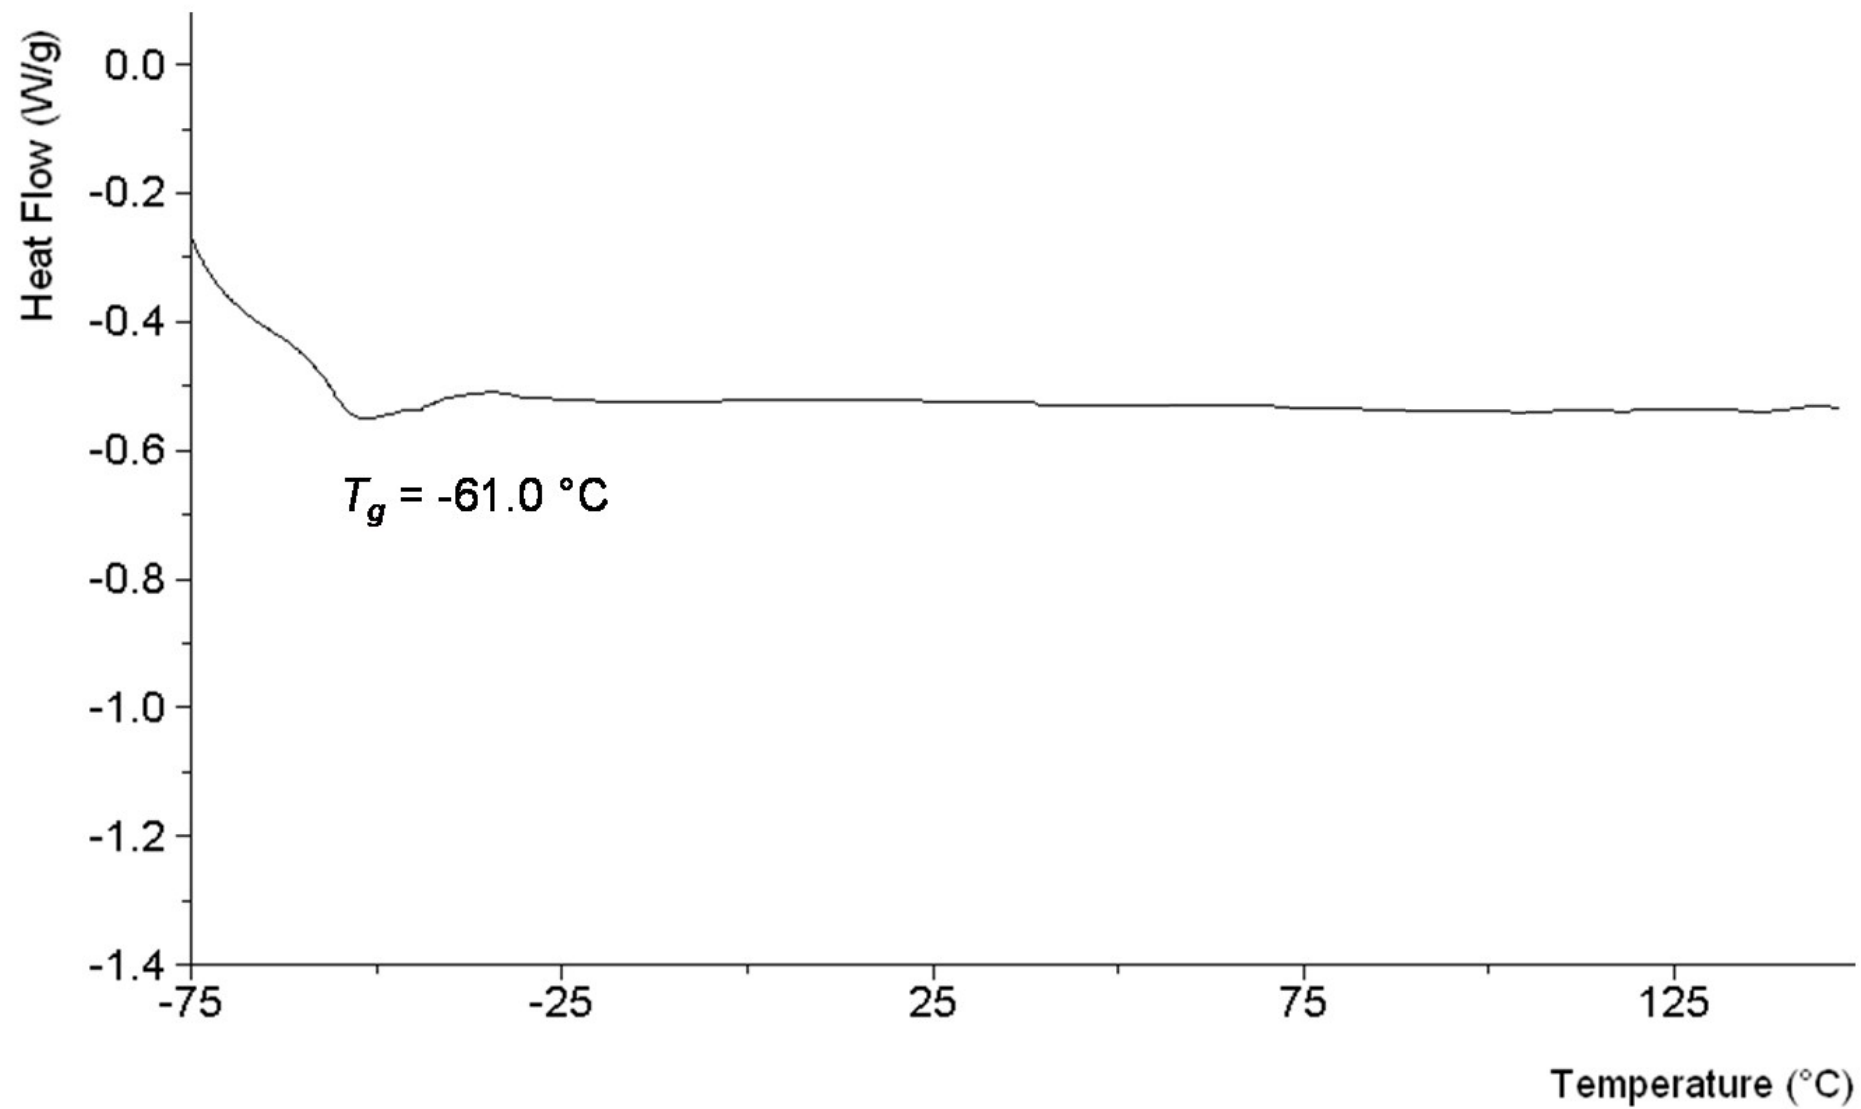

**Figure S20.** DSC thermogram (II run) of poly( $\omega$ -hexadecalactone) with with 6-mercapto-1-hexanol groups groups (*d*).

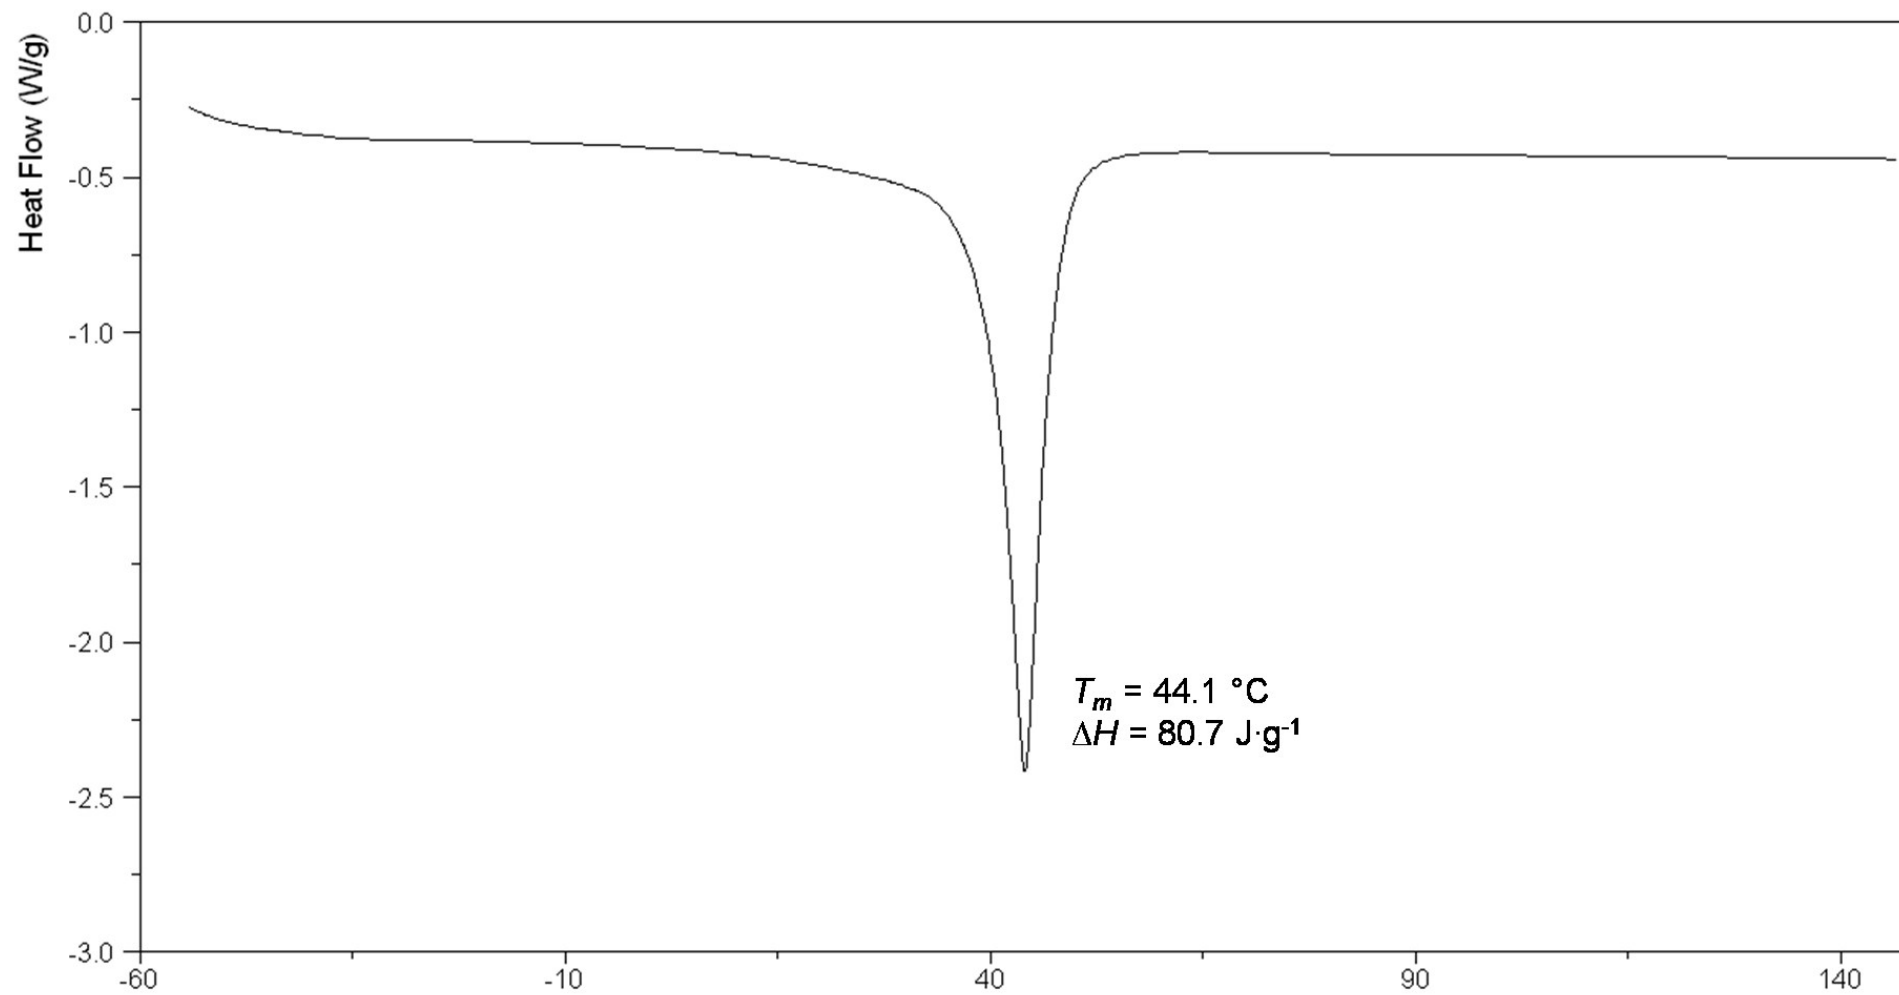

**Figure S21.** DSC thermogram (II run) of poly[(6- $\omega$ -hexadecenlactone)-*ran*-( $\epsilon$ -caprolactone)].

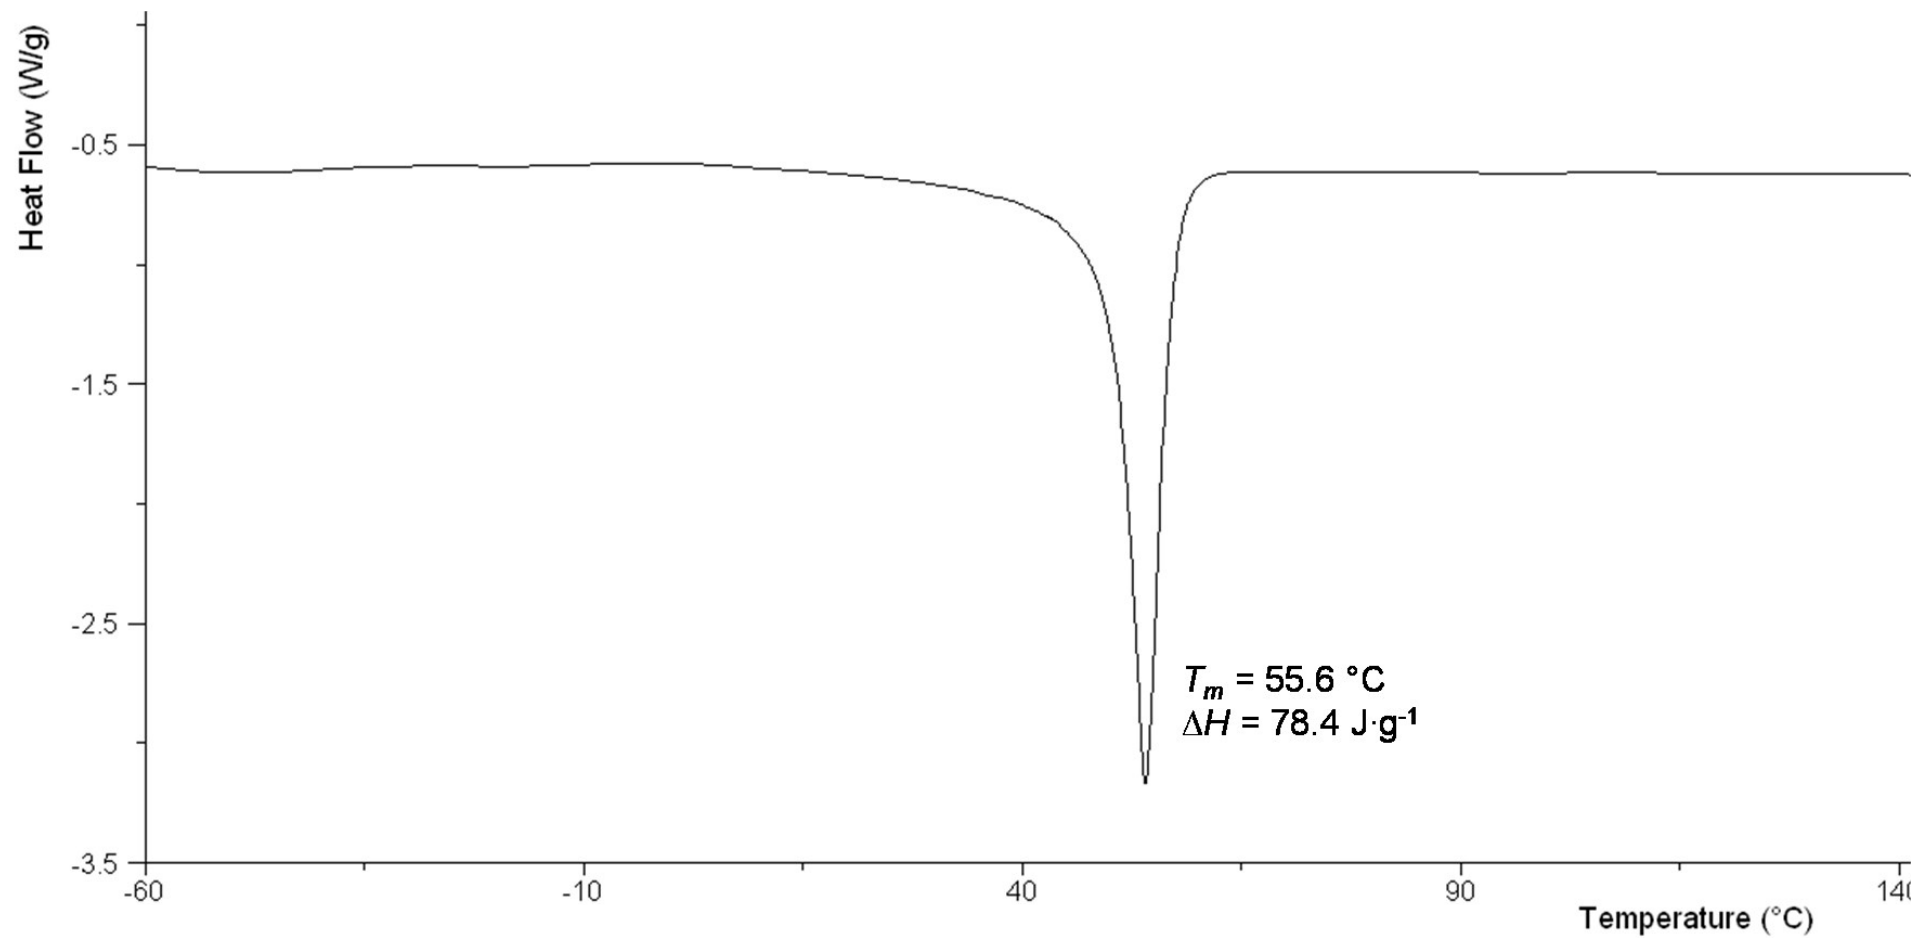

**Figure S22.** DSC thermogram (II run) of poly(6- $\omega$ -hexadecenlactone)-*block*-poly( $\epsilon$ -caprolactone).

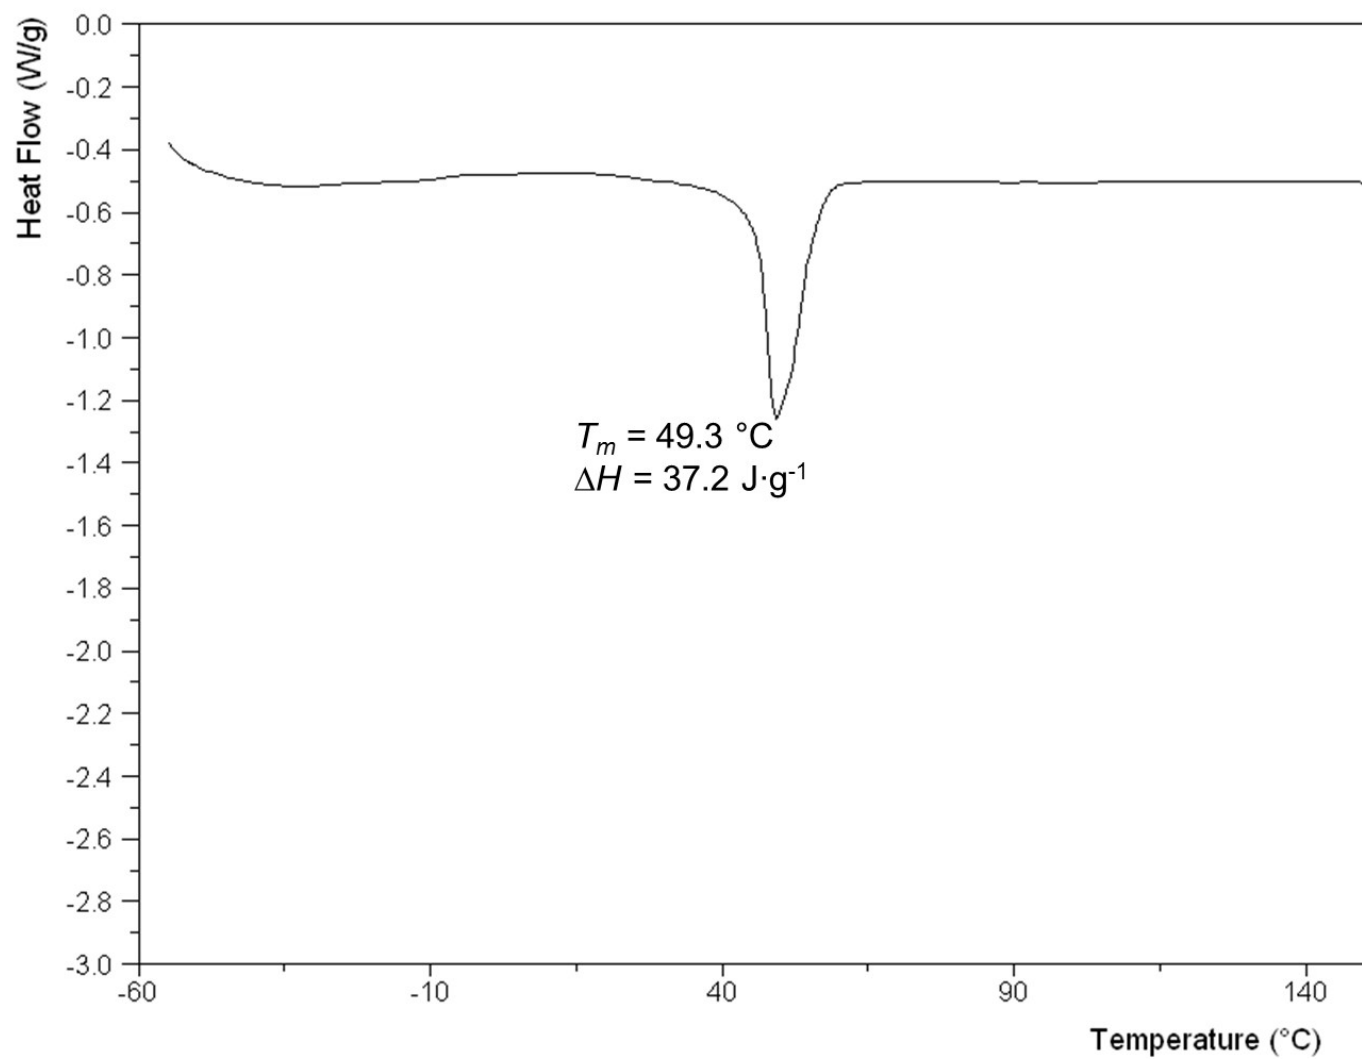

**Figure S23.** DSC thermogram (II run) of poly(6- $\omega$ -hexadecenlactone)-*block*-poly(*rac*-lactide).

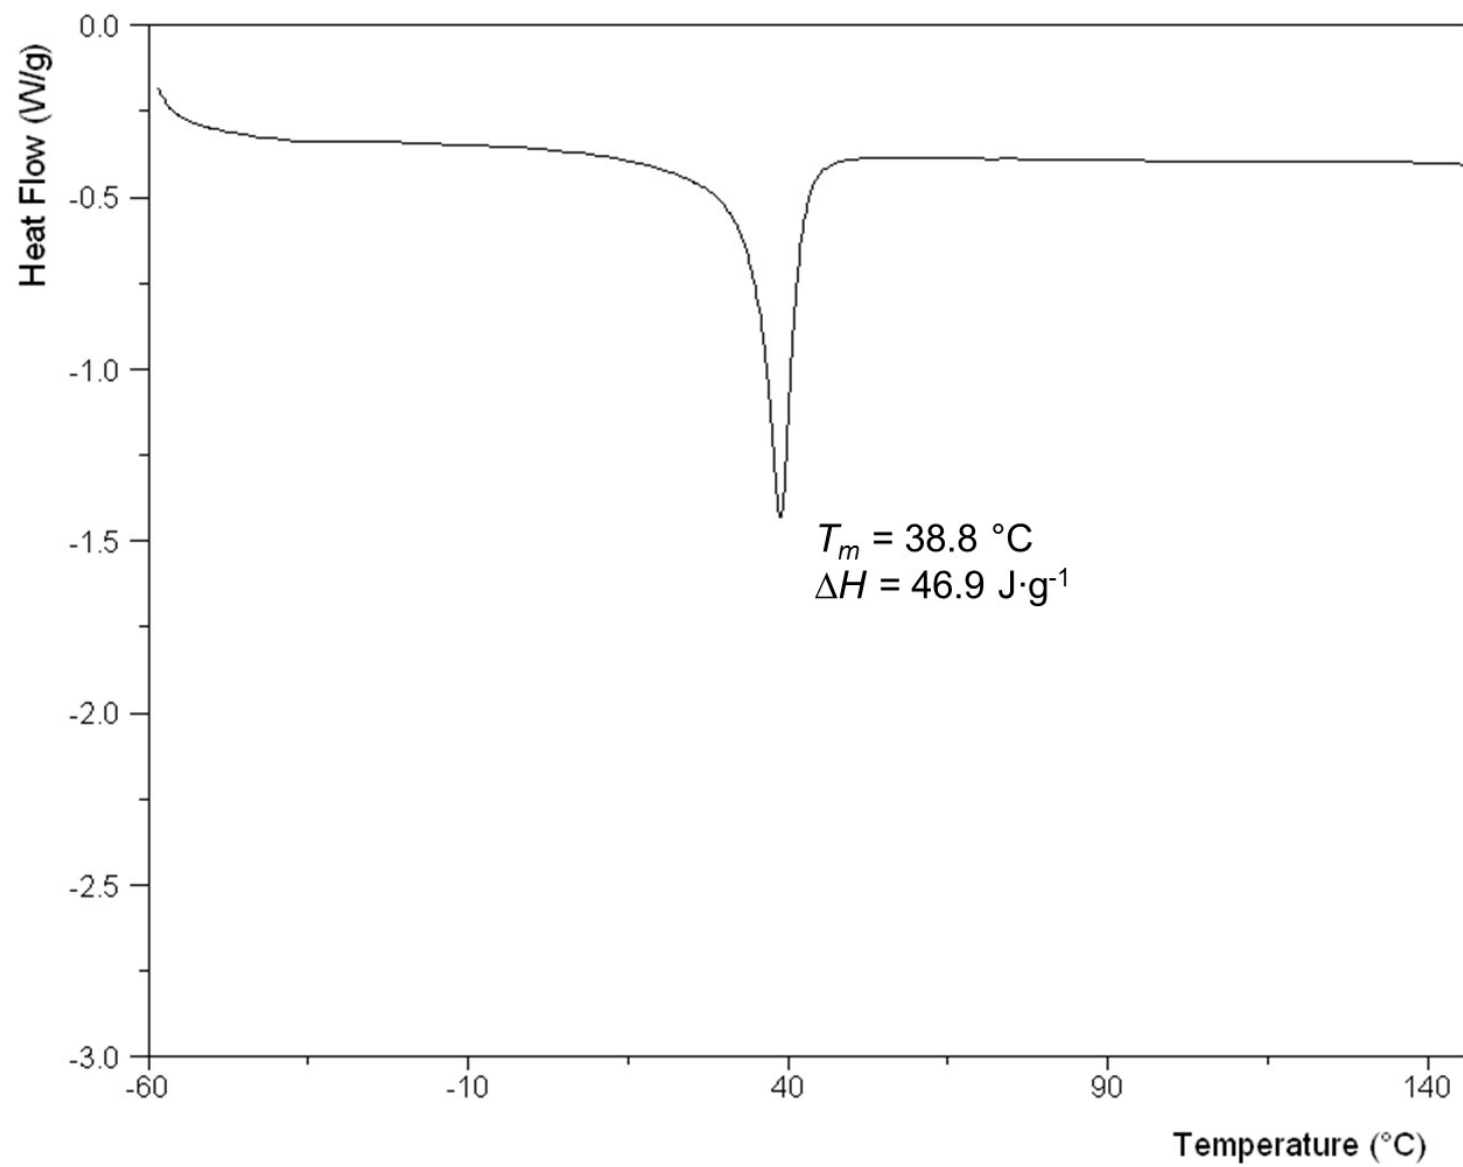

**Figure S24.** DSC thermogram (II run) of poly[(6- $\omega$ -hexadecenlactone)-*ran*-( $\epsilon$ -caprolactone)]-*block*-poly(*rac*-lactide).

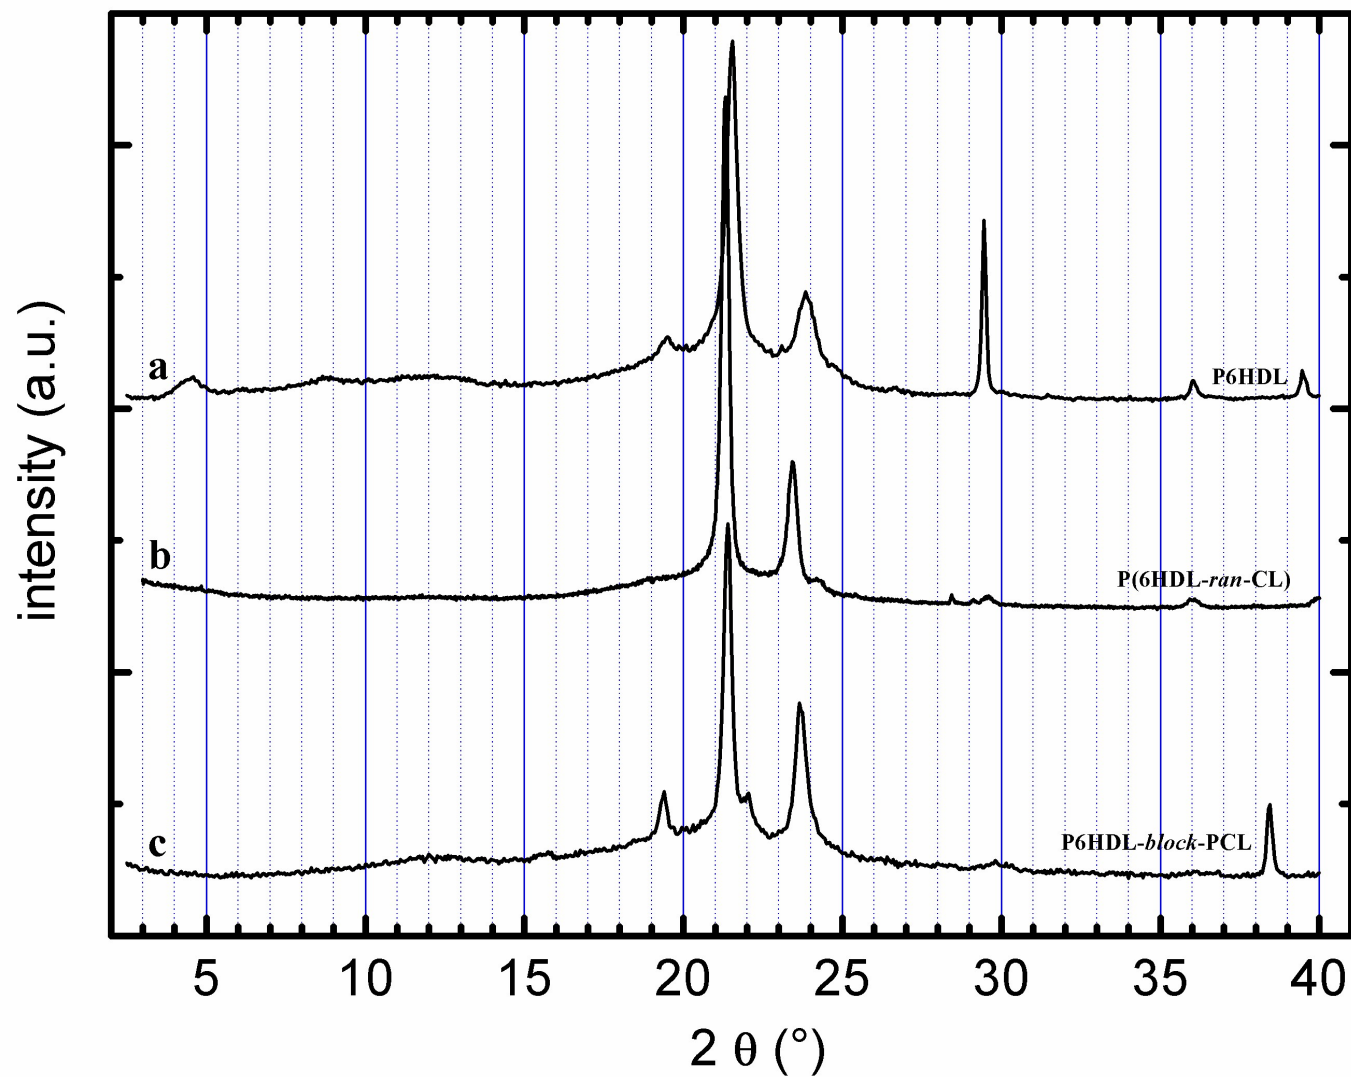

**Figure S25.** X-ray diffraction pattern of: (a) poly(6- $\omega$ -hexadecenlactone); (b) poly[(6- $\omega$ -hexadecenlactone)-*ran*-( $\epsilon$ -caprolactone)]; (c) poly(6- $\omega$ -hexadecenlactone)-*block*-poly( $\epsilon$ -caprolactone).

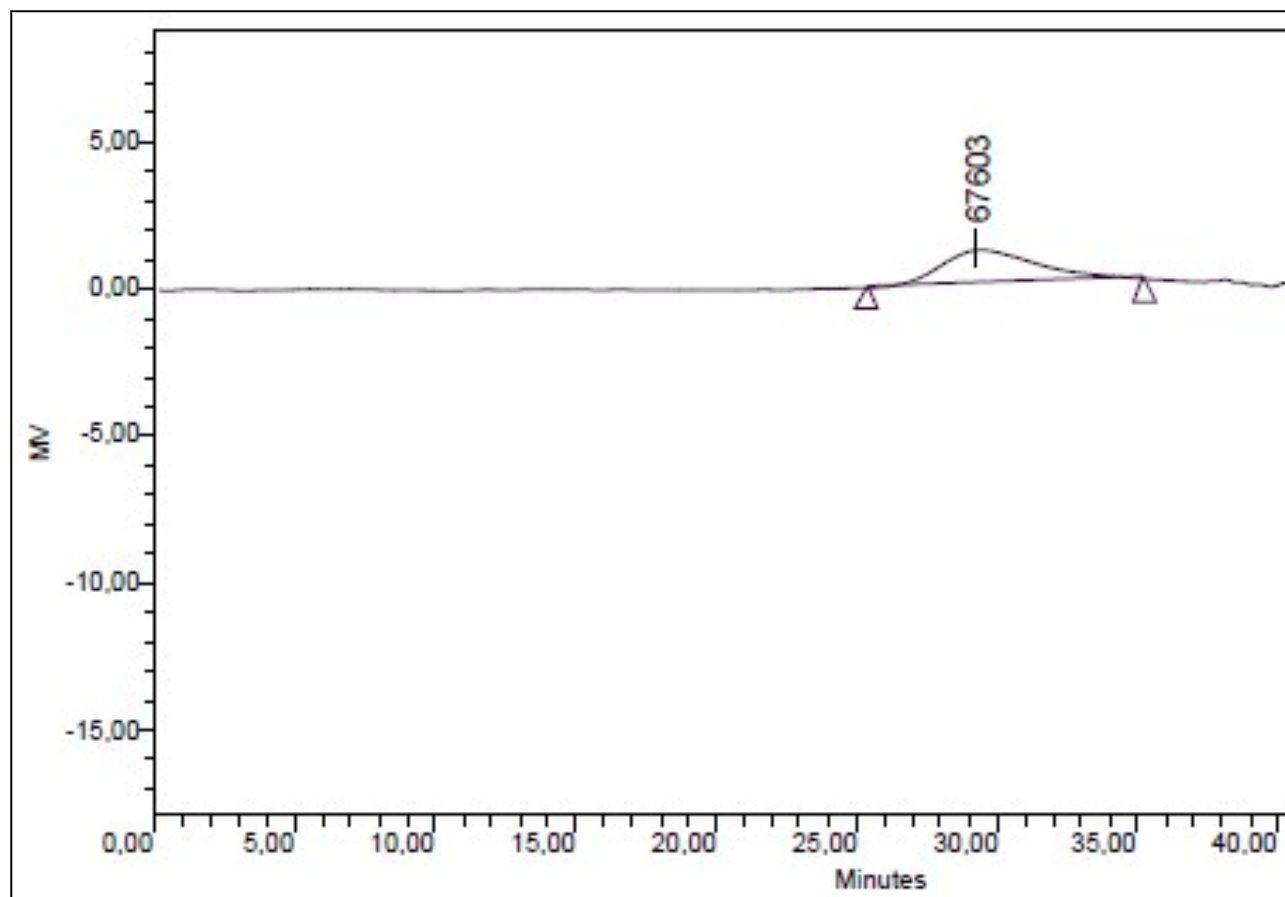

|   | Distribution Name | Mn (Daltons) | Mw (Daltons) | MP (Daltons) | Mz (Daltons) | Mz+1 (Daltons) | Polydispersity | Mz/Mw    | Mz+1/Mw  |
|---|-------------------|--------------|--------------|--------------|--------------|----------------|----------------|----------|----------|
| 1 |                   | 40045        | 64834        | 67603        | 94570        | 125843         | 1,619029       | 1,458645 | 1,941001 |

**Figure S26.** GPC chromatogram of poly(6- $\omega$ -hexadecenlactone).

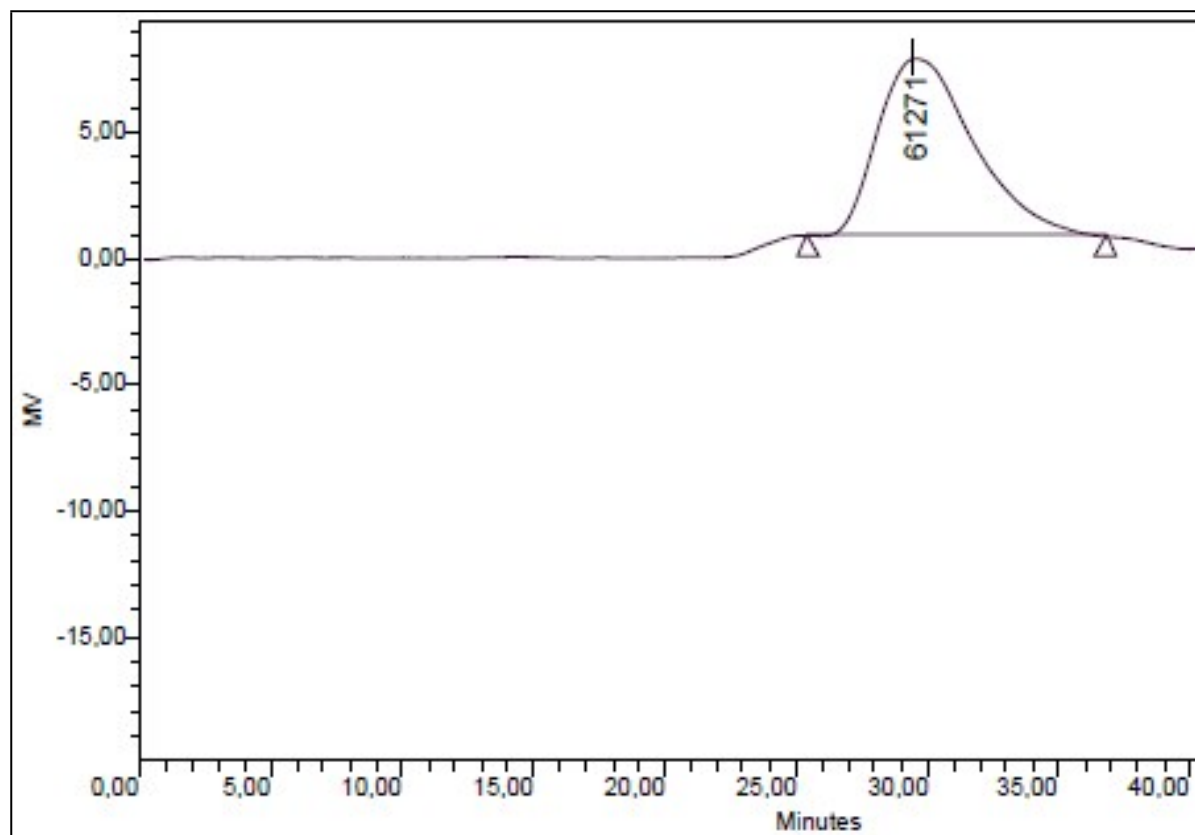

|   | Distribution Name | Mn (Daltons) | Mw (Daltons) | MP (Daltons) | Mz (Daltons) | Mz+1 (Daltons) | Polydispersity | Mz/Mw    | Mz+1/Mw  |
|---|-------------------|--------------|--------------|--------------|--------------|----------------|----------------|----------|----------|
| 1 |                   | 36009        | 58765        | 61271        | 83498        | 106812         | 1,631946       | 1,420883 | 1,817619 |

**Figure S27.** GPC chromatogram of poly[(6- $\omega$ -hexadecenlactone)-*ran*-( $\epsilon$ -caprolactone)].



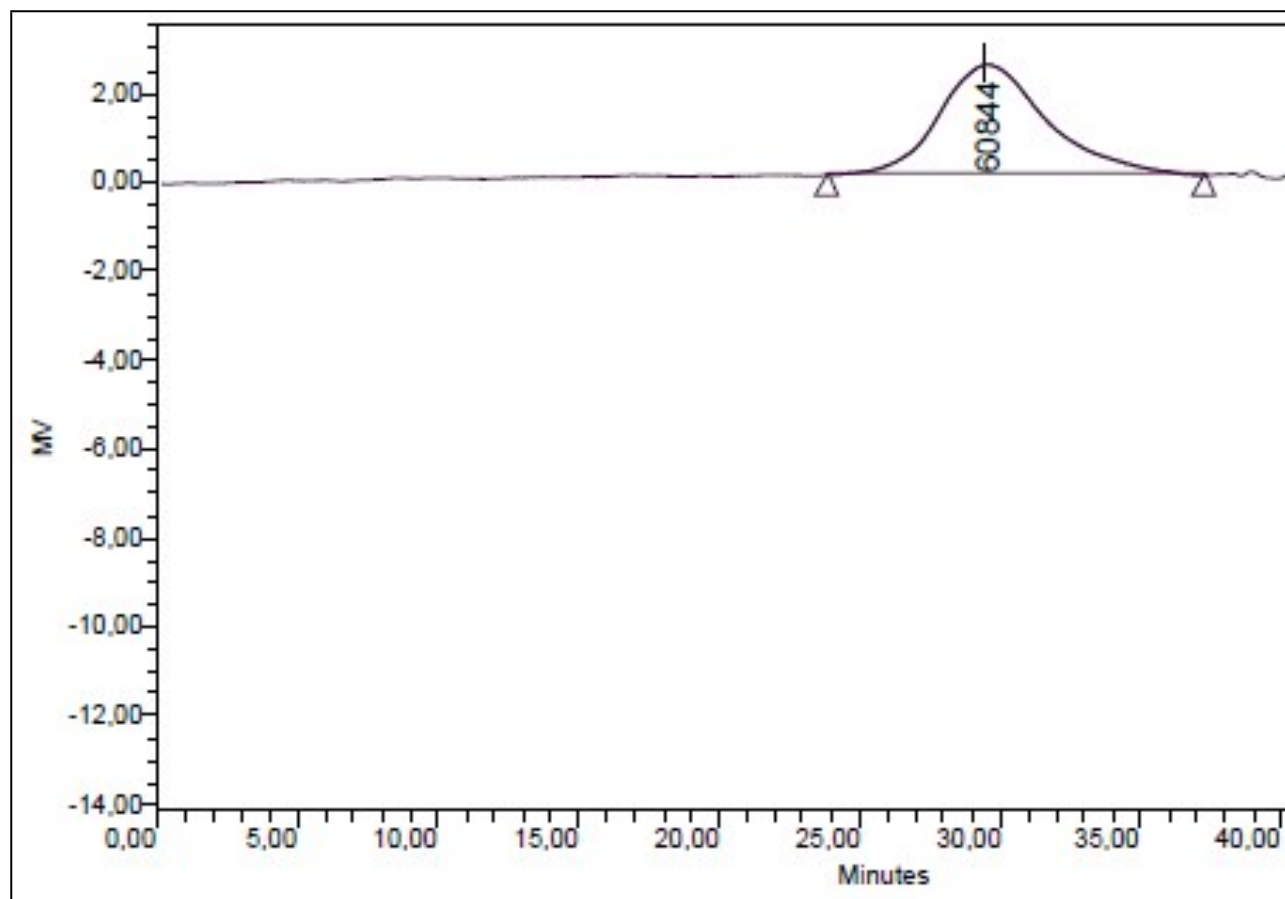

|   | Distribution Name | Mn (Daltons) | Mw (Daltons) | MP (Daltons) | Mz (Daltons) | Mz+1 (Daltons) | Polydispersity | Mz/Mw    | Mz+1/Mw  |
|---|-------------------|--------------|--------------|--------------|--------------|----------------|----------------|----------|----------|
| 1 |                   | 37521        | 72252        | 60844        | 132028       | 234102         | 1,925649       | 1,827312 | 3,240052 |

**Figure S28.** GPC chromatogram of poly(6- $\omega$ -hexadecenlactone)-*block*-poly( $\epsilon$ -caprolactone).

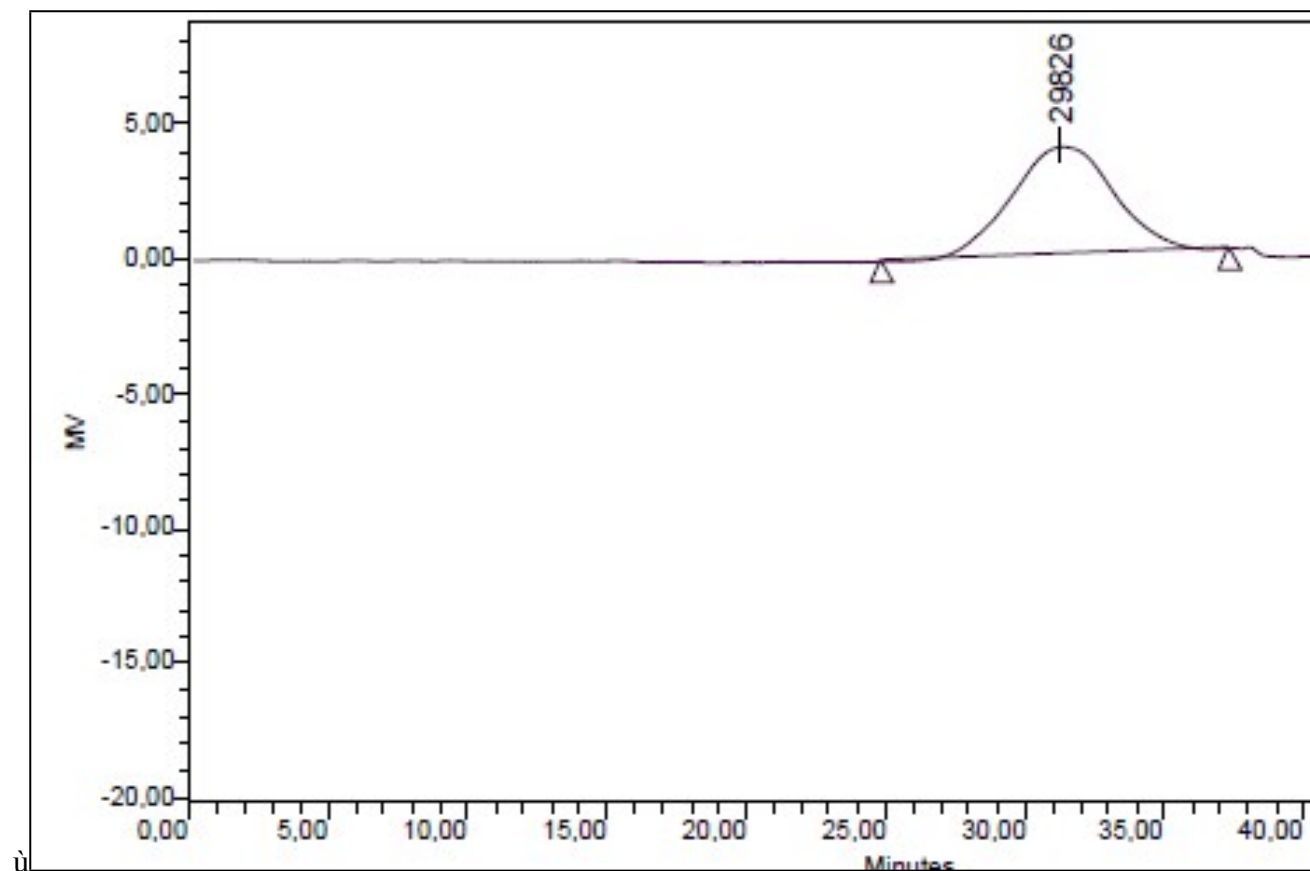

|   | Distribution Name | Mn (Daltons) | Mw (Daltons) | MP (Daltons) | Mz (Daltons) | Mz+1 (Daltons) | Polydispersity | Mz/Mw    | Mz+1/Mw  |
|---|-------------------|--------------|--------------|--------------|--------------|----------------|----------------|----------|----------|
| 1 |                   | 24288        | 36916        | 29826        | 55859        | 79566          | 1,519940       | 1,513131 | 2,155316 |

**Figure S29.** GPC chromatogram of poly(6- $\omega$ -hexadecenlactone)-*block*-(*rac*-lactide).

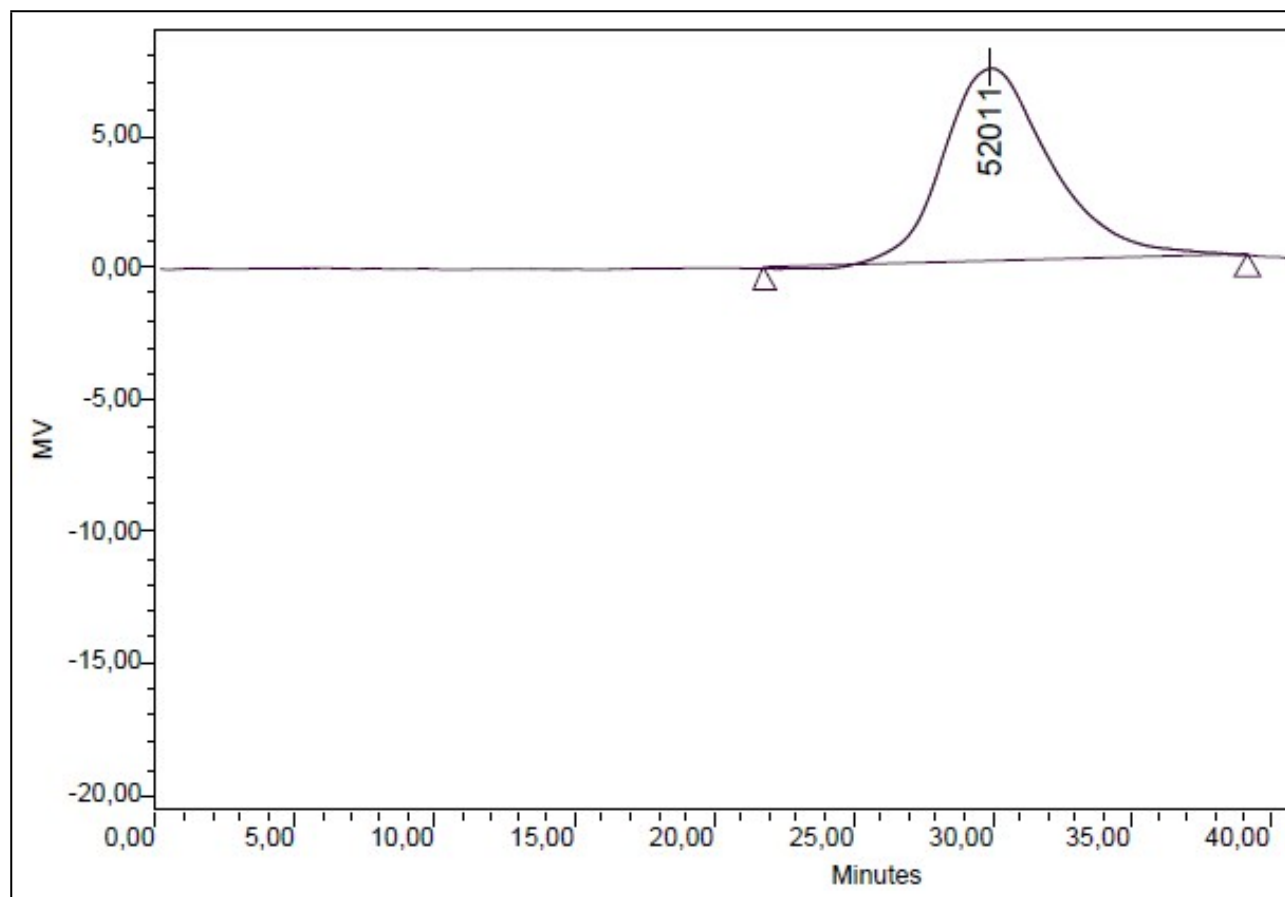

|   | Distribution Name | Mn (Daltons) | Mw (Daltons) | MP (Daltons) | Mz (Daltons) | Mz+1 (Daltons) | Polydispersity | Mz/Mw    | Mz+1/Mw  |
|---|-------------------|--------------|--------------|--------------|--------------|----------------|----------------|----------|----------|
| 1 |                   | 29113        | 58949        | 52011        | 103505       | 171264         | 2,024844       | 1,755853 | 2,905298 |

**Figure S30.** GPC chromatogram of poly[(6- $\omega$ -hexadecenlactone)-*ran*-( $\epsilon$ -caprolactone)]-*block*-poly(*rac*-lactide).

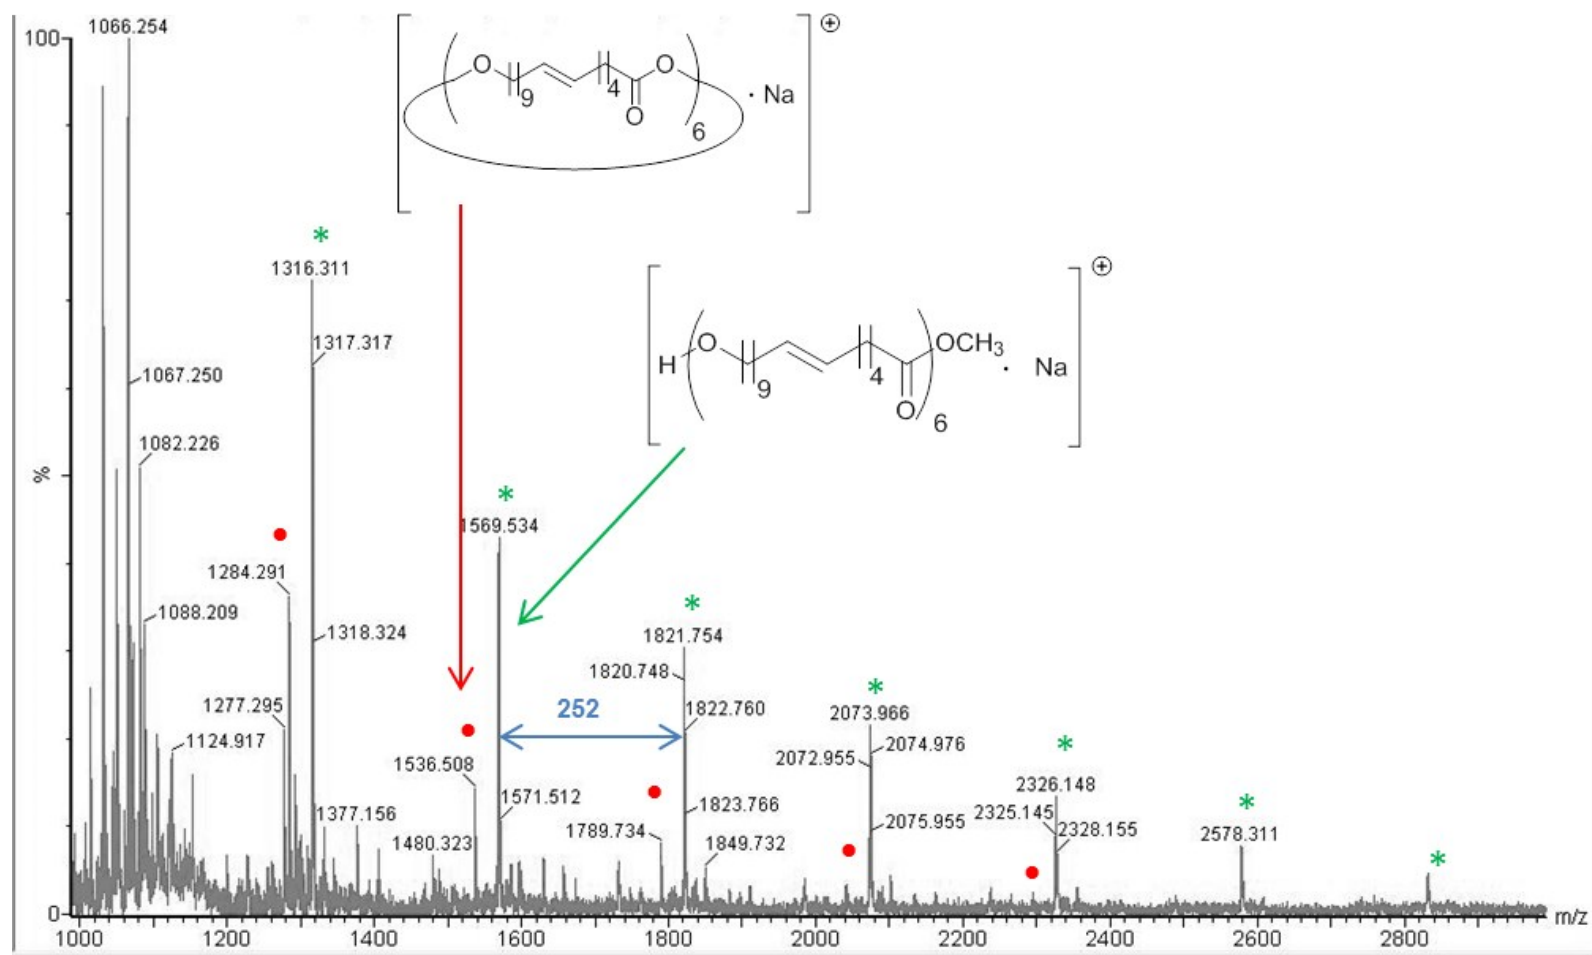

**Figure S31.** MALDI-ToF-MS of crude poly(6- $\omega$ -hexadecenlactone) (run 12, Table S1). Two sets of peaks corresponding to the linear and cyclic polymer species (doped with  $\text{Na}^+$ ) are marked with asterisk (\*) and dagger ( $\bullet$ ) symbols, respectively.
